# Supplementary material for: The RAM signaling pathway links morphology, thermotolerance, and CO2 tolerance in the global fungal pathogen Cryptococcus neoformans
Source: eLife. 2022 Nov 23;11:e82563. doi: 10.7554/eLife.82563 (PMC9708076; doi:10.7554/eLife.82563)
Supplement: Source data 1. [file elife-82563-data1.xlsx]

## Sheet: Probeset
Source data 1. NanoString Probe Targets
Count	Gene ID	Name
1	CNAG_00039	Zinc finger C2H2-type
2	CNAG_00097	myo-inositol transporter, putative
3	CNAG_00414	Maintenance of killer protein 32, putative
4	CNAG_00444	hypothetical protein
5	CNAG_00883	Putative Zn2-Cys6 zinc-finger transcription factor
6	CNAG_01243	histone-lysine N-methyltransferase, H3 lysine-4 specific
7	CNAG_02532	FAD dependent oxidoreductase
8	CNAG_03050	FAD dependent oxidoreductase
9	CNAG_03159	Ankyrin repeat-containing domain
10	CNAG_03227	Arv1 protein
11	CNAG_03567	RAM signaling network protein kinase, putative
12	CNAG_04213	signal transducer
13	CNAG_04243	cell division control protein 24
14	CNAG_04655	rab family protein
15	CNAG_04951	3-deoxy-7-phosphoheptulonate synthase
16	CNAG_05159	hypothetical protein
17	CNAG_05451	hypothetical protein
18	CNAG_05558	CAMK/CAMKL/KIN4 protein kinase
19	CNAG_05678	Acetate transporter GPR1/FUN34/SatP family
20	CNAG_06373	mitotic spindle assembly checkpoint protein MAD2B
21	CNAG_06583	hypothetical protein
22	CNAG_07358	hypothetical protein
23	CNAG_01463	hypothetical protein
24	CNAG_01464	Flavohemoglobin
25	CNAG_01469	CDP-diacylglycerol-serine O- phosphatidyltransferase
26	CNAG_01487	Zn2/Cys6 DNA-binding domain
27	CNAG_04096	racemase
28	CNAG_04417	alpha-ketoglutarate-dependent 2,4- dichlorophenoxyacetate dioxygenase
29	CNAG_05551	GAMMA TUBULIN COMPLEX PROTEIN
30	CNAG_05755	protein MAK16
31	CNAG_05757	AT hook, DNA-binding motif
32	CNAG_06182	minichromosome maintenance protein 4 (cell division control protein 54)
33	CNAG_06529	TRANS-1,2-DIHYDROBENZENE-1,2-DIOL DEHYDROGENASE
34	CNAG_00440	Ssn801
35	CNAG_06092	Cln1
36	CNAG_02095	Clb3/Cbc1
37	CNAG_00183	Pcl2
38	CNAG_00442	Pcl9
39	CNAG_03385	Pcl103
40	CNAG_06534	HMG1
41	CNAG_06829	ERG1
42	CNAG_00040	ERG11
43	CNAG_01737	ERG25
44	CNAG_03819	ERG6
45	CNAG_00519	ERG3
46	CNAG_04804	SRE1
47	CNAG_01242	HAPX
48	CNAG_07873	CSH1
49	CNAG_07749	TSC10
50	CNAG_03080	ELO2
51	CNAG_01477	LCB2
52	CNAG_06165	TSC11
53	CNAG_04283	FLC3
54	CNAG_00897	SKN1
55	CNAG_02487	PHS1
56	CNAG_04453	AUR1
57	CNAG_05692	YSR3
58	CNAG_07730	Tricarboxylic acid Transporter
59	CNAG_02045	KBC
60	CNAG_02288	Mitochondrial Citrate Transporter
61	CNAG_05303	Isocitrate Lyase
62	CNAG_07316	hydroxyacid-oxoacid transhydrogenase
63	CNAG_06499	DPP101
64	CNAG_04256	hypothetical protein
65	CNAG_01542	Taurine Dioxygenase
66	CNAG_00777	CCR4-NOT transcriptional complex subunit CAF120
67	CNAG_05835	LIV3
68	CNAG_04496	RabGTPase activator
69	CNAG_01882	Histone Methyltransferase
70	CNAG_02060	hypothetical protein
71	CNAG_07799	ABC transporter
72	CNAG_00331	anon-23da protein
73	CNAG_05387	Galactose Transporter
74	CNAG_02751	short-chain dehydrogenase
75	CNAG_03495	hypothetical protein
76	CNAG_07902	AAT family amino acid transporter
77	CNAG_03346	bZip transcription factor, putative
78	CNAG_04098	PDR-5
79	CNAG_06169	hypothetical protein
80	CNAG_00866	Transketolase
81	CNAG_06291	FPD1, Cda4
82	CNAG_03910	ITR6
83	CNAG_01945	oxidoreductase
84	CNAG_02781	Dihydrodipocholinate synthetase
85	CNAG_04346	Dihydrodipocholinate synthetase
86	CNAG_01341	ISP3
87	CNAG_00834	phosphatidylserine decarboxylase, variant
88	CNAG_05077	glycosyl hydrolase
89	CNAG_00269	Sorbitol Dehydrogenase
90	CNAG_02849	glutathione transferase
91	CNAG_04355	hypothetical protein
92	CNAG_03369	SWE102
93	CNAG_06916	hypothetical protein
94	CNAG_02491	nuclear protein
95	CNAG_03284	hypothetical protein
96	CNAG_06252	CCD6
97	CNAG_01810	RPA12
98	CNAG_02455	Choline Transporter
99	CNAG_03526	Chromosome Transmission Fidelity-8
100	CNAG_04899	cytoplasmic protein
101	CNAG_03474	EncT
102	CNAG_03129	Transcription Factor IIIA
103	CNAG_05968	CDC420
104	CNAG_05571	U3 small nucleolar RNA-associated protein 20
105	CNAG_03302	protein LTV1
106	CNAG_05333	Likely Transcription Factor (XlnR)
107	CNAG_04216	Upstream of PEP Carboxykinase
108	CNAG_01075	methylmalonate-semialdehyde dehydrogenase (acylating)
109	CNAG_02553	Short-chain dehydrogenase
110	CNAG_02722	aldose reductase
111	CNAG_02991	cofilin
112	CNAG_00816	microtubule binding protein
113	CNAG_00279	Mitochondrial protein
114	CNAG_03358	Phosphoglycerate kinase
115	CNAG_06125	TEF1
116	CNAG_00483	ACT1
117	CNAG_06746	H2B
118	CNAG_06699	GPD1

## Sheet: NanoString_Counts
Probe Name	Accession #	Class Name	Avg Count	Min Count	Max Count	%CV	Analyte Type	Annotation	H99 Amb 1	H99 Amb 2	H99 Amb 3	H99 CO2 1	H99 CO2 2	H99 CO2 3	cbk1 Amb 1	cbk1 Amb 2	cbk1 Amb 3	cbk1 CO2 1	cbk1 CO2 2	cbk1 CO2 3	cbk1 sup1 Amb 1	cbk1 sup1 Amb 2	cbk1 sup1 Amb 3	cbk1 sup1 CO2 1	cbk1 sup1 CO2 2	cbk1 sup1 CO2 3	cbk1 sup2 Amb 1	cbk1 sup2 Amb 2	cbk1 sup2 Amb 3	cbk1 sup2 CO2 1	cbk1 sup2 CO2 2	cbk1 sup2 CO2 3
CNAG_00039	CNAG_00039.1	Endogenous	404	255	537	25.93	mRNA	ZFC6	624	686	508	753	924	708	745	668	614	784	713	1019	644	745	688	868	758	862	583	598	540	704	535	641
CNAG_00040	CNAG_00040.1	Endogenous	792	609	1088	25.02	mRNA	ERG11	2564	3173	2311	2804	3565	2555	2018	1870	1761	1660	1285	2025	2972	2847	2623	3349	2604	3298	2194	2313	2171	2977	2044	2513
CNAG_00097	CNAG_00097.1	Endogenous	400.67	244	588	30.89	mRNA	ITR1	224	243	185	279	331	221	288	328	207	239	193	250	187	221	235	174	208	178	221	205	194	175	135	178
CNAG_00183	CNAG_00183.1	Endogenous	505	429	676	18.41	mRNA		1538	1783	1226	1320	1539	1116	1666	1468	1440	2257	2579	2679	1202	1494	1397	1519	2032	1734	1084	1137	1079	963	882	1263
CNAG_00269	CNAG_00269.1	Endogenous	16.83	11	20	18.18	mRNA		169	142	119	132	122	103	190	267	225	150	136	179	150	215	227	110	134	99	231	272	228	117	120	132
CNAG_00279	CNAG_00279.1	Endogenous	1295.5	1055	1453	11.13	mRNA		1641	1680	1201	1279	1561	1161	2204	2882	2286	2565	2598	3037	1483	1796	1748	1618	2649	1714	1725	1772	1697	1531	1398	1741
CNAG_00331	CNAG_00331.1	Endogenous	716.33	328	1109	43.47	mRNA		533	474	394	1742	2339	1628	216	192	143	333	269	401	109	85	114	443	293	409	80	59	56	368	242	379
CNAG_00414	CNAG_00414.1	Endogenous	88.33	73	110	17.5	mRNA	MAK32	58	62	55	52	72	54	146	183	137	176	158	166	66	108	85	164	130	171	90	124	109	126	137	152
CNAG_00440	CNAG_00440.1	Endogenous	154.33	128	181	13.12	mRNA	SSN801	135	123	114	127	175	136	259	251	195	246	187	267	115	166	175	199	245	191	148	148	152	177	139	193
CNAG_00442	CNAG_00442.1	Endogenous	215.17	68	409	65.02	mRNA		225	233	193	372	446	349	95	94	81	113	87	116	113	103	97	134	82	158	82	93	94	156	117	127
CNAG_00444	CNAG_00444.1	Endogenous	1037.33	693	1475	25.66	mRNA		411	413	273	357	395	256	628	895	605	485	389	576	329	409	421	261	699	283	365	372	363	282	230	310
CNAG_00483	CNAG_00483.1	Endogenous	2301.17	1588	3735	33.62	mRNA	ACT1	9359	10433	7725	7995	10245	6870	8814	9578	7855	7818	6883	8896	7091	8306	7825	7123	7324	7584	7090	7784	7012	6660	5159	6436
CNAG_00519	CNAG_00519.1	Endogenous	612.67	343	1060	40.96	mRNA	ERG3	1402	1567	1199	1041	1326	915	1045	1017	906	1052	870	1070	982	1294	1329	1243	1563	1189	1100	1102	971	1036	973	1125
CNAG_00777	CNAG_00777.1	Endogenous	637.83	358	921	33.77	mRNA		1083	1199	926	899	949	749	1464	1553	1298	1174	1003	1251	1415	1392	1423	1216	1292	1234	1215	1155	1129	1253	1016	1053
CNAG_00816	CNAG_00816.1	Endogenous	11893.2	8843	18199	30.33	mRNA		1964	2204	1443	2714	3492	2035	6033	9891	5540	7659	6726	8249	2703	3906	4273	3091	7367	2792	4300	4615	4214	3476	3307	4051
CNAG_00834	CNAG_00834.1	Endogenous	218.67	72	429	67.99	mRNA		91	123	88	403	448	328	2267	2593	2783	3164	3134	3871	255	310	396	187	426	253	371	375	432	389	436	465
CNAG_00866	CNAG_00866.1	Endogenous	1913	822	3518	57.11	mRNA		3895	5123	3840	3057	4138	2774	12539	15250	12829	16601	15562	20494	7966	9844	10380	5374	7141	4828	9592	11150	10466	6797	6079	7571
CNAG_00883	CNAG_00883.1	Endogenous	1027.83	671	1320	26.04	mRNA	ECM2201	1414	1617	1174	2980	3679	2534	741	681	542	1019	812	1121	559	544	588	1589	1768	1501	516	426	415	1376	1058	1292
CNAG_00897	CNAG_00897.1	Endogenous	7486.33	5894	9104	18.24	mRNA	SKN1	14486	16266	11282	13848	16033	11295	17165	17739	14181	13439	10929	14338	13030	14635	15173	13767	20316	13486	14153	13457	12522	14087	11170	13399
CNAG_01075	CNAG_01075.1	Endogenous	27.17	23	35	17.17	mRNA		64	52	36	46	67	57	76	70	76	97	65	90	62	101	71	101	101	89	72	81	58	67	76	66
CNAG_01242	CNAG_01242.1	Endogenous	609.17	382	915	32.76	mRNA	HAPX	1230	1371	1044	1213	1371	1071	1242	1135	1083	1567	1280	1536	821	1034	1078	1211	1301	1161	1084	1197	1171	1514	1258	1395
CNAG_01243	CNAG_01243.1	Endogenous	278.5	204	369	20.17	mRNA	SET101	724	790	568	681	771	544	537	419	456	505	465	528	357	403	438	457	516	455	359	372	324	466	370	489
CNAG_01341	CNAG_01341.1	Endogenous	1406.17	818	2151	42.43	mRNA	ISP3	456	493	403	454	639	418	2140	2989	2358	3049	2502	3432	755	1019	1109	482	696	504	1150	1289	1196	931	863	995
CNAG_01463	CNAG_01463.1	Endogenous	452.67	309	672	29.27	mRNA		241	265	184	261	316	226	377	385	314	382	353	406	221	282	271	364	456	356	225	213	214	360	336	272
CNAG_01464	CNAG_01464.1	Endogenous	163	76	297	52.6	mRNA	FHB1	233	245	164	185	254	153	3093	3509	2444	3993	3152	3962	3542	3848	4080	1793	2967	2255	3014	2933	2770	2467	2128	2822
CNAG_01469	CNAG_01469.1	Endogenous	199.67	161	242	14.18	mRNA		902	910	642	826	926	701	620	645	542	515	503	636	669	569	542	805	604	790	515	467	489	844	628	659
CNAG_01477	CNAG_01477.1	Endogenous	630.17	507	804	21.22	mRNA		2538	3026	2013	2436	3049	2080	1690	1619	1380	1695	1498	1648	1438	1761	1654	2054	2174	2048	1437	1480	1326	1839	1500	1833
CNAG_01487	CNAG_01487.1	Endogenous	55	41	77	24.64	mRNA		55	78	55	70	80	56	90	93	82	153	124	193	114	121	126	128	129	146	115	109	87	115	97	94
CNAG_01542	CNAG_01542.1	Endogenous	1594.67	1033	2801	40.1	mRNA		271	339	279	193	257	178	476	611	399	661	548	654	475	646	729	745	993	734	610	726	645	760	791	853
CNAG_01737	CNAG_01737.1	Endogenous	2355.67	1465	4013	39.2	mRNA	ERG25	4113	5120	3691	3425	4044	3085	4481	4474	3647	4231	3280	4517	6962	7379	6849	7093	6076	7769	5452	5278	5048	6863	4722	5698
CNAG_01810	CNAG_01810.1	Endogenous	304.83	89	524	69.4	mRNA		256	253	205	189	289	186	536	575	449	597	422	596	712	649	685	730	1017	651	489	479	423	565	370	489
CNAG_01882	CNAG_01882.1	Endogenous	153.33	100	223	27.99	mRNA		213	255	175	203	232	195	174	177	128	124	112	140	111	119	112	117	141	90	120	105	72	126	107	118
CNAG_01945	CNAG_01945.1	Endogenous	87.67	70	115	19.35	mRNA		37	48	18	48	47	36	85	77	76	105	93	113	34	55	49	46	85	51	45	41	55	44	38	45
CNAG_02045	CNAG_02045.1	Endogenous	75.5	31	107	39.29	mRNA		208	256	135	197	220	189	81	93	62	73	54	66	83	133	99	81	91	63	112	124	123	59	55	79
CNAG_02060	CNAG_02060.1	Endogenous	247.33	136	382	37.82	mRNA		2730	2789	2211	2439	2947	2254	232	167	164	124	78	149	269	266	260	341	198	284	143	140	120	234	137	196
CNAG_02095	CNAG_02095.1	Endogenous	524	352	724	27.37	mRNA		1499	1581	1266	1167	1430	963	1320	1352	1073	993	919	1132	376	500	484	346	364	342	337	343	314	251	218	278
CNAG_02288	CNAG_02288.1	Endogenous	71.17	58	91	19.6	mRNA		93	108	77	185	178	187	96	94	102	136	198	117	320	520	449	306	415	616	548	612	573	152	126	309
CNAG_02455	CNAG_02455.1	Endogenous	568.83	241	1000	51.45	mRNA		980	1109	807	1559	1835	1197	979	1043	800	1891	1760	2243	1430	1324	1283	2340	1900	2560	1080	1004	1005	2388	1567	1959
CNAG_02487	CNAG_02487.1	Endogenous	141.33	115	199	23	mRNA	PHS1	323	352	248	327	404	324	285	331	266	294	277	341	320	442	447	357	276	376	387	447	409	355	325	404
CNAG_02491	CNAG_02491.1	Endogenous	130.17	94	163	17.3	mRNA		463	577	370	373	394	292	163	165	120	161	119	168	147	179	168	182	207	158	154	119	89	134	104	130
CNAG_02532	CNAG_02532.1	Endogenous	477.5	229	801	47.28	mRNA		210	239	185	637	844	505	428	510	327	579	545	626	234	344	318	766	742	672	288	281	242	608	452	593
CNAG_02553	CNAG_02553.1	Endogenous	94.17	76	123	23.05	mRNA		78	68	64	124	132	97	148	179	159	137	121	195	101	141	139	106	158	101	117	97	99	88	78	88
CNAG_02722	CNAG_02722.1	Endogenous	1138.5	668	1665	34.49	mRNA		2097	2602	1752	1941	2406	1598	8612	10561	8599	8626	7674	10077	6003	6102	6154	4000	6129	4119	5469	5547	5325	5046	3906	4670
CNAG_02751	CNAG_02751.1	Endogenous	2179.67	587	4144	77.01	mRNA		608	869	623	1551	2009	1074	23541	30735	28284	66856	66602	89356	9935	12830	16050	11327	23838	13046	16146	19274	18718	16250	15911	19205
CNAG_02781	CNAG_02781.1	Endogenous	74.17	61	103	20.33	mRNA		131	116	84	481	569	366	252	326	247	980	864	1127	92	122	148	319	478	267	98	94	110	220	193	255
CNAG_02849	CNAG_02849.1	Endogenous	60.67	45	76	22.71	mRNA		45	54	57	130	178	105	64	61	50	68	60	76	46	69	67	61	44	41	39	41	50	43	31	44
CNAG_02991	CNAG_02991.1	Endogenous	8417.5	6381	9704	14.34	mRNA		8886	10381	6741	9586	11215	7566	13002	15569	12037	12515	11449	14988	7667	9025	8826	9001	14684	8294	7804	7737	7346	8554	6862	7956
CNAG_03050	CNAG_03050.1	Endogenous	135.83	91	168	25.41	mRNA		104	131	91	136	158	107	146	170	124	177	145	206	86	103	129	98	168	139	125	106	108	127	128	150
CNAG_03080	CNAG_03080.1	Endogenous	804.5	560	1372	38.52	mRNA		3496	3852	2903	3048	3383	2786	2831	2657	2166	3039	2449	3148	2509	2558	2502	3310	3712	3082	2119	1860	1724	3043	2318	2522
CNAG_03129	CNAG_03129.1	Endogenous	465.5	352	713	28	mRNA		534	582	445	490	604	435	814	848	607	662	519	800	922	964	970	900	1105	753	828	779	729	727	569	691
CNAG_03159	CNAG_03159.1	Endogenous	359.17	219	462	25.23	mRNA		303	381	250	316	428	330	558	720	462	619	569	676	439	545	495	559	1004	504	422	417	371	493	392	457
CNAG_03227	CNAG_03227.1	Endogenous	1069	619	1577	37.25	mRNA		302	309	249	438	577	339	459	540	393	569	465	487	292	363	384	270	267	249	321	397	350	295	238	291
CNAG_03284	CNAG_03284.1	Endogenous	344.83	221	489	36.04	mRNA		401	480	317	389	465	330	575	621	449	547	360	622	760	802	724	715	947	619	640	619	573	609	437	483
CNAG_03302	CNAG_03302.1	Endogenous	164.17	79	301	55.86	mRNA		301	296	277	249	279	245	366	339	318	354	298	408	422	497	487	388	413	358	420	320	329	336	261	315
CNAG_03346	CNAG_03346.1	Endogenous	230.17	96	423	61.64	mRNA	BZP4	443	463	319	156	230	172	227	282	206	145	135	120	292	423	404	178	324	177	333	376	319	147	136	135
CNAG_03358	CNAG_03358.1	Endogenous	1557.5	969	2430	33.67	mRNA		5096	5345	4011	4416	5435	3820	6246	6814	5294	6355	5492	7002	6332	6697	6607	6150	6229	6338	6179	6307	5764	6335	5630	6590
CNAG_03369	CNAG_03369.1	Endogenous	118.17	76	148	26.17	mRNA	SWE102	1330	1528	1179	1034	1109	863	188	210	178	148	92	146	169	166	177	152	157	155	152	130	139	141	121	119
CNAG_03385	CNAG_03385.1	Endogenous	4438.83	2205	8036	51.3	mRNA	PCL103	8897	10047	6952	7438	7920	6471	22135	21454	18508	20384	18191	24483	14827	14490	14725	14852	20604	16042	4793	3922	3667	3946	2863	3452
CNAG_03474	CNAG_03474.1	Endogenous	64.5	29	122	61.24	mRNA		82	76	60	55	82	78	111	142	97	138	77	118	134	161	131	158	143	130	133	124	109	124	98	145
CNAG_03495	CNAG_03495.1	Endogenous	54.83	25	100	49.84	mRNA		84	89	76	172	232	139	757	931	1079	933	902	1323	121	188	182	116	121	105	187	247	207	163	161	182
CNAG_03526	CNAG_03526.1	Endogenous	107.17	84	145	22.67	mRNA		442	526	364	386	406	296	163	180	143	168	144	181	177	194	161	228	200	177	128	130	135	146	126	144
CNAG_03567	CNAG_03567.1	Endogenous	671.33	510	880	20.42	mRNA	CBK1	1904	2269	1436	1990	2205	1737	40	30	31	58	48	77	17	11	16	22	31	24	22	18	26	17	14	24
CNAG_03819	CNAG_03819.1	Endogenous	776.5	666	857	8.14	mRNA	ERG6	2527	2989	1950	2075	2540	1927	1922	1976	1558	1319	1022	1387	1633	2003	1839	1890	2703	1887	1458	1384	1239	1295	1045	1271
CNAG_03910	CNAG_03910.1	Endogenous	304	256	378	15.37	mRNA	ITR6	6048	6756	4540	3006	3428	2601	1442	1469	1472	547	604	554	1728	2341	2191	905	1308	1161	2537	2545	2546	632	595	868
CNAG_04096	CNAG_04096.1	Endogenous	112.33	89	153	22.88	mRNA		150	143	119	181	209	149	289	298	253	266	215	306	197	145	181	155	172	204	169	144	143	181	129	119
CNAG_04098	CNAG_04098.1	Endogenous	869.67	245	1600	70.38	mRNA	PDR5-2	2257	2880	2215	1271	1433	1011	5449	5174	4634	6616	6032	7457	6490	7449	7434	7257	9468	7467	7203	7073	6808	7036	6026	6954
CNAG_04213	CNAG_04213.1	Endogenous	679.5	509	947	24.03	mRNA		3163	3445	2448	2942	3311	2510	1121	948	881	833	671	825	970	976	928	1191	1159	1088	692	599	590	1033	725	814
CNAG_04216	CNAG_04216.1	Endogenous	32.5	21	41	23.41	mRNA		31	22	18	16	28	15	43	47	41	30	44	62	15	20	16	23	22	16	24	23	21	19	20	15
CNAG_04243	CNAG_04243.1	Endogenous	277.17	185	370	24.17	mRNA	CDC24	1621	1595	1235	1336	1557	1136	707	685	522	528	479	527	861	839	829	866	736	750	753	706	688	753	619	672
CNAG_04256	CNAG_04256.1	Endogenous	397.33	344	492	14.65	mRNA	LPI6	241	258	180	295	335	234	504	598	519	442	401	479	286	371	409	272	307	265	410	470	423	353	303	354
CNAG_04283	CNAG_04283.1	Endogenous	1507.33	975	2202	29.16	mRNA		1524	1745	1396	2182	2610	1827	2919	2909	2720	3401	2997	4762	1989	2060	2110	2430	3387	2471	1765	1648	1660	2410	1725	2046
CNAG_04346	CNAG_04346.1	Endogenous	70.33	60	75	7.82	mRNA		130	144	101	115	136	94	188	185	174	149	148	172	122	132	124	125	131	142	99	125	94	124	91	129
CNAG_04355	CNAG_04355.1	Endogenous	143.67	56	290	66.77	mRNA		232	238	177	200	243	201	426	388	368	475	342	538	325	367	329	373	573	320	256	205	177	273	193	218
CNAG_04417	CNAG_04417.1	Endogenous	564.5	348	912	39.27	mRNA		535	587	418	1294	1339	1000	649	633	511	3373	3145	4365	689	665	647	2861	3761	3232	551	487	477	1751	1321	1654
CNAG_04453	CNAG_04453.1	Endogenous	94.17	62	133	27.84	mRNA	IPC1	580	618	422	554	655	459	198	198	188	165	170	199	129	180	145	229	147	241	141	144	154	271	232	234
CNAG_04496	CNAG_04496.1	Endogenous	389.83	316	475	16.16	mRNA		2665	3054	2131	2070	2623	1821	612	549	483	485	368	472	765	759	691	917	784	826	635	532	536	853	668	770
CNAG_04655	CNAG_04655.1	Endogenous	284.5	173	460	36.93	mRNA		485	508	383	448	620	474	381	373	283	396	325	491	168	229	240	242	335	243	207	176	155	219	164	231
CNAG_04804	CNAG_04804.1	Endogenous	1119.5	855	1733	28.59	mRNA	SRE1	1511	1897	1347	1712	2052	1481	1743	1784	1547	1908	1621	1972	1320	1939	1963	1886	2172	1788	1860	1924	1748	1850	1620	2074
CNAG_04899	CNAG_04899.1	Endogenous	439.5	228	669	43.85	mRNA		737	839	555	815	947	665	1317	1396	1105	1406	1205	1763	1270	1358	1310	1751	1959	1402	1007	905	931	1553	968	1218
CNAG_04951	CNAG_04951.1	Endogenous	499	421	629	15.6	mRNA		777	893	702	1442	1829	1272	1062	1033	872	1316	1057	1618	1159	1095	1122	2535	2025	2230	816	784	726	2043	1264	1665
CNAG_05077	CNAG_05077.1	Endogenous	312.17	105	614	69.15	mRNA	LPI11	795	869	695	483	672	438	2235	2681	2239	1969	1744	2357	1140	1366	1539	530	853	501	1356	1481	1435	800	787	944
CNAG_05159	CNAG_05159.1	Endogenous	4739.33	2628	8130	45.25	mRNA		1790	1868	1361	3149	3506	2602	2406	3013	2075	3210	2729	3305	1021	1307	1286	2023	3415	2037	1440	1346	1207	2135	1831	2203
CNAG_05303	CNAG_05303.1	Endogenous	23.33	20	27	15.73	mRNA	ICL1	149	203	120	142	179	218	89	80	92	110	172	70	832	999	961	480	477	954	1006	1021	1131	176	161	422
CNAG_05333	CNAG_05333.1	Endogenous	18	12	33	43.18	mRNA		303	285	241	288	338	252	412	409	343	358	300	333	146	201	218	155	208	183	201	196	192	198	153	194
CNAG_05387	CNAG_05387.1	Endogenous	206.17	143	308	29.6	mRNA		2087	2353	1816	1909	2230	1562	1112	1197	973	810	749	826	1470	1784	1695	1502	1568	1494	1892	1943	1818	1215	1061	1306
CNAG_05451	CNAG_05451.1	Endogenous	337.67	305	383	9.33	mRNA		497	549	364	500	586	418	337	352	282	319	291	373	255	317	294	328	429	394	249	275	259	309	275	369
CNAG_05551	CNAG_05551.1	Endogenous	111	86	160	23.41	mRNA		452	477	346	349	401	327	219	248	169	185	153	179	142	201	184	163	180	132	144	134	144	164	113	147
CNAG_05558	CNAG_05558.1	Endogenous	325	245	406	18.23	mRNA	KIN4	1509	1593	1120	1146	1234	1057	813	789	721	683	633	747	735	758	775	844	1000	809	625	480	466	709	554	662
CNAG_05571	CNAG_05571.1	Endogenous	468.83	217	860	54.04	mRNA		2646	2958	2369	2992	3381	2544	2200	1950	1735	2621	2221	2841	3484	3632	3335	4923	4058	4534	2662	2455	2357	3862	2705	3239
CNAG_05678	CNAG_05678.1	Endogenous	853.5	421	1675	58.93	mRNA		1597	1809	1261	1884	2239	1678	1480	1603	1236	1564	1452	1770	1669	2313	2406	2199	3192	2224	2035	1921	1915	1518	1208	1649
CNAG_05692	CNAG_05692.1	Endogenous	225.17	189	282	14.51	mRNA	LCB3	633	685	490	527	662	448	439	432	329	334	309	391	423	528	459	553	476	542	444	459	432	458	391	443
CNAG_05755	CNAG_05755.1	Endogenous	783.17	367	1306	53.71	mRNA		1405	1549	1133	1324	1568	1094	2107	2212	1711	1955	1469	2438	3105	3321	2802	3320	3336	2972	2387	2254	2065	2685	1909	2174
CNAG_05757	CNAG_05757.1	Endogenous	632.67	332	987	43.1	mRNA		539	614	417	507	588	422	1034	1115	816	963	644	1228	1167	1333	1424	1100	1591	808	1171	1051	938	820	686	785
CNAG_05835	CNAG_05835.1	Endogenous	1968.17	1415	2432	20.38	mRNA	LIV3	2488	2711	2016	5448	6081	4539	2330	2414	2024	3906	3102	5080	3036	2832	2863	4768	4791	5165	2396	2180	2108	4349	3065	3559
CNAG_05968	CNAG_05968.1	Endogenous	301.17	148	432	30.04	mRNA	CDC420	515	578	420	423	550	378	304	403	238	284	200	307	359	382	346	417	446	334	291	272	296	352	199	246
CNAG_06092	CNAG_06092.1	Endogenous	3496.83	2826	4215	15.18	mRNA	CLN1	9463	11201	8152	9506	11253	7797	11068	10321	8468	7966	6853	8179	12719	12507	11636	10969	12003	11007	8558	7690	7336	7610	5840	6659
CNAG_06125	CNAG_06125.1	Endogenous	17499.3	9554	28842	41.26	mRNA	TEF1	64749	77573	58389	66681	75656	60122	82952	78416	73703	69169	60856	80346	78648	85355	76345	98235	107772	108363	63545	61670	57681	79319	62448	75922
CNAG_06165	CNAG_06165.1	Endogenous	302.67	257	364	14.88	mRNA		531	520	381	523	586	393	563	567	469	534	470	587	395	476	467	477	608	427	466	484	476	450	436	525
CNAG_06169	CNAG_06169.1	Endogenous	431	153	896	67.63	mRNA		597	836	628	788	1014	654	5715	6978	6576	8714	8396	10922	1831	2358	2512	1080	1814	1228	2432	2720	2581	1833	1716	1982
CNAG_06182	CNAG_06182.1	Endogenous	119.5	81	161	28.46	mRNA		1053	1263	784	913	1080	801	426	408	329	364	280	398	425	509	457	493	556	514	359	338	288	401	297	372
CNAG_06252	CNAG_06252.1	Endogenous	328.83	156	540	54.7	mRNA	CCD6	443	483	413	335	415	342	780	785	598	817	639	859	886	999	931	883	1197	805	759	747	655	737	530	659
CNAG_06291	CNAG_06291.1	Endogenous	120.67	54	214	59.87	mRNA	FPD1	54	80	60	111	151	110	556	729	780	523	487	641	213	252	361	182	233	216	371	438	432	287	250	316
CNAG_06373	CNAG_06373.1	Endogenous	126.17	83	183	32.71	mRNA		118	123	79	131	145	90	220	248	217	293	282	404	229	259	256	294	405	292	179	204	174	243	177	242
CNAG_06499	CNAG_06499.1	Endogenous	719.17	552	908	20.76	mRNA	DPP101	1070	1213	834	857	1089	684	1021	1006	860	609	601	630	684	840	783	588	668	584	806	834	704	584	489	620
CNAG_06529	CNAG_06529.1	Endogenous	88	51	114	32.68	mRNA		111	154	98	217	226	141	212	237	165	171	191	228	114	100	121	167	186	177	115	99	75	125	100	142
CNAG_06534	CNAG_06534.1	Endogenous	221	159	313	24.62	mRNA	HMG1	1219	1267	1009	1211	1461	1136	623	566	536	631	528	750	718	873	790	870	825	803	660	632	572	750	543	660
CNAG_06583	CNAG_06583.1	Endogenous	56	47	65	11.63	mRNA		484	603	376	412	448	344	130	165	137	157	217	173	189	273	254	285	445	468	231	229	203	132	126	177
CNAG_06699	CNAG_06699.1	Endogenous	12932.5	7570	20862	37.84	mRNA	GPD1	32282	34920	25366	33487	40186	27320	46547	52624	40478	39199	34413	43571	37143	46532	45015	39814	47480	36097	41307	41560	38883	39975	33440	40138
CNAG_06746	CNAG_06746.1	Endogenous	5474.17	4503	6406	14.38	mRNA	H2B	18341	18833	14354	11792	13117	9954	10510	11974	9444	7827	6671	8474	6923	7683	7949	6639	9723	5579	6498	6089	5888	5749	4344	5000
CNAG_06829	CNAG_06829.1	Endogenous	429.5	283	636	28.76	mRNA	ERG1	490	542	378	610	698	554	647	660	496	738	501	668	576	606	661	916	847	854	567	565	547	882	749	956
CNAG_06916	CNAG_06916.1	Endogenous	219.67	62	398	74.24	mRNA		460	554	408	438	591	383	1575	1617	1288	1705	1477	1998	1646	1979	2120	1602	2589	1399	1734	1532	1444	1452	1065	1348
CNAG_07316	CNAG_07316.1	Endogenous	313.5	215	472	29.98	mRNA		355	413	294	420	442	346	613	729	603	529	487	614	479	605	635	425	596	506	537	613	545	388	327	402
CNAG_07358	CNAG_07358.1	Endogenous	618.17	453	828	22.27	mRNA		425	379	274	539	675	460	292	349	255	332	254	452	164	236	234	251	316	244	174	215	185	216	216	270
CNAG_07730	CNAG_07730.1	Endogenous	57.33	45	66	13.54	mRNA		81	105	70	79	80	75	99	90	91	146	73	139	87	107	106	131	102	115	82	98	82	101	107	121
CNAG_07749	CNAG_07749.1	Endogenous	293.17	256	335	11.79	mRNA		371	470	296	378	376	332	517	626	497	520	515	558	421	472	475	412	506	434	399	453	405	487	397	451
CNAG_07799	CNAG_07799.1	Endogenous	1048.33	199	2602	87.64	mRNA		125	143	115	474	591	386	178	206	147	252	196	258	127	137	151	237	229	205	126	147	127	260	183	250
CNAG_07873	CNAG_07873.1	Endogenous	595.17	333	1001	44.2	mRNA		1806	2036	1436	1424	1682	1301	1111	1043	856	699	520	646	1290	1377	1303	1034	1160	973	1109	994	871	800	592	714
CNAG_07902	CNAG_07902.1	Endogenous	835.5	436	1365	42.2	mRNA		1123	1222	847	1201	1609	1049	3327	3721	3105	5183	4926	6619	1866	2295	2690	2530	4695	2549	2545	2762	2503	3723	3523	4126
NEG_A	ERCC_00096.1	Negative	49.33	42	60	12.41	System		56	54	39	55	57	41	49	51	41	54	45	47	45	49	49	40	50	38	33	39	37	43	44	36
NEG_B	ERCC_00041.1	Negative	19	11	26	26.42	System		25	23	20	20	25	19	24	19	20	22	21	26	11	22	22	23	19	15	15	24	16	15	15	17
NEG_C	ERCC_00019.1	Negative	5.67	3	7	26.57	System		13	6	11	9	7	7	21	32	16	42	43	57	6	13	12	15	16	13	15	11	20	13	10	13
NEG_D	ERCC_00076.1	Negative	10.17	4	16	42.38	System		26	26	24	15	18	16	29	20	24	31	12	31	11	14	31	31	26	22	14	20	16	9	23	21
NEG_E	ERCC_00098.1	Negative	13.33	7	20	36.33	System		17	24	21	18	19	15	22	16	13	23	12	25	14	16	17	24	14	14	12	22	18	14	16	15
NEG_F	ERCC_00126.1	Negative	34.83	29	40	13.76	System		45	49	31	45	44	41	37	42	27	51	47	66	27	25	46	51	34	33	40	29	29	41	33	38
NEG_G	ERCC_00144.1	Negative	4.33	1	8	66.35	System		9	12	13	5	9	12	17	6	8	8	7	10	6	8	10	10	5	9	11	9	6	11	6	7
NEG_H	ERCC_00154.1	Negative	7	4	10	28.57	System		22	26	19	14	24	23	16	22	12	28	10	25	15	26	17	23	15	26	9	20	12	14	18	25
POS_A	ERCC_00117.1	Positive	38133.5	33604	42898	8.33	System		35933	38581	41966	39386	40450	37362	32136	33861	29818	35751	36443	33988	30271	32742	34683	33588	34748	32553	28534	28807	29121	29855	28654	29329
POS_B	ERCC_00112.1	Positive	12122	10902	12753	5.97	System		10583	11329	12655	11803	11634	11041	9280	10093	9060	10775	10928	9953	9677	10767	11435	10785	11176	10191	9372	9122	9224	9279	9087	9291
POS_C	ERCC_00002.1	Positive	3512.67	3299	3742	5.16	System		2910	3190	3357	3275	3206	3021	2652	2736	2268	2982	3049	2610	2651	2816	3191	3052	3170	2917	2403	2616	2550	2667	2748	2680
POS_D	ERCC_00092.1	Positive	784.33	741	828	4.73	System		736	751	794	777	803	781	621	722	605	725	738	708	599	699	748	730	781	743	605	572	619	619	633	664
POS_E	ERCC_00035.1	Positive	154.83	131	175	10.17	System		149	150	157	148	146	136	129	138	110	142	147	140	113	129	127	128	139	107	106	110	130	103	109	110
POS_F	ERCC_00034.1	Positive	78.67	71	88	7.35	System		88	95	110	73	94	81	91	72	62	84	80	79	64	76	84	80	103	82	73	71	71	66	77	84
								Background Average	26.625	27.5	22.25	22.625	25.375	21.75	26.875	26	20.125	32.375	24.625	35.875	16.875	21.625	25.5	27.125	22.375	21.25	18.625	21.75	19.25	20	20.625	21.5
								Background SD	16.0974	16.4924	9.17683	17.7518	17.1125	12.7699	11.2051	14.7261	10.5484	15.6656	17.3612	18.9166	13.1523	12.7048	15.0333	13.282	14.0909	10.3613	11.3759	9.55809	9.72111	13.7217	12.4893	10.9545
								Avg + 2SD	58.8197	60.4848	40.6037	58.1285	59.6001	47.2899	49.2851	55.4521	41.2217	63.7062	59.3474	73.7083	43.1795	47.0345	55.5666	53.6889	50.5568	41.9727	41.3768	40.8662	38.6922	47.4434	45.6036	43.4089
Background Subtraction
CNAG_00039	CNAG_00039.1	Endogenous	404	255	537	25.93	mRNA	ZFC6	565.18	625.515	467.396	694.871	864.4	660.71	695.715	612.548	572.778	720.294	653.653	945.292	600.82	697.965	632.433	814.311	707.443	820.027	541.623	557.134	501.308	656.557	489.396	597.591
CNAG_00040	CNAG_00040.1	Endogenous	792	609	1088	25.02	mRNA	ERG11	2505.18	3112.52	2270.4	2745.87	3505.4	2507.71	1968.71	1814.55	1719.78	1596.29	1225.65	1951.29	2928.82	2799.97	2567.43	3295.31	2553.44	3256.03	2152.62	2272.13	2132.31	2929.56	1998.4	2469.59
CNAG_00097	CNAG_00097.1	Endogenous	400.67	244	588	30.89	mRNA	ITR1	165.18	182.515	144.396	220.871	271.4	173.71	238.715	272.548	165.778	175.294	133.653	176.292	143.82	173.965	179.433	120.311	157.443	136.027	179.623	164.134	155.308	127.557	89.3964	134.591
CNAG_00183	CNAG_00183.1	Endogenous	505	429	676	18.41	mRNA		1479.18	1722.52	1185.4	1261.87	1479.4	1068.71	1616.71	1412.55	1398.78	2193.29	2519.65	2605.29	1158.82	1446.97	1341.43	1465.31	1981.44	1692.03	1042.62	1096.13	1040.31	915.557	836.396	1219.59
CNAG_00269	CNAG_00269.1	Endogenous	16.83	11	20	18.18	mRNA		110.18	81.5152	78.3963	73.8715	62.3999	55.7101	140.715	211.548	183.778	86.2938	76.6526	105.292	106.82	167.965	171.433	56.3111	83.4432	57.0273	189.623	231.134	189.308	69.5566	74.3964	88.5911
CNAG_00279	CNAG_00279.1	Endogenous	1295.5	1055	1453	11.13	mRNA		1582.18	1619.52	1160.4	1220.87	1501.4	1113.71	2154.71	2826.55	2244.78	2501.29	2538.65	2963.29	1439.82	1748.97	1692.43	1564.31	2598.44	1672.03	1683.62	1731.13	1658.31	1483.56	1352.4	1697.59
CNAG_00331	CNAG_00331.1	Endogenous	716.33	328	1109	43.47	mRNA		474.18	413.515	353.396	1683.87	2279.4	1580.71	166.715	136.548	101.778	269.294	209.653	327.292	65.8205	37.9655	58.4334	389.311	242.443	367.027	38.6232	18.1338	17.3078	320.557	196.396	335.591
CNAG_00414	CNAG_00414.1	Endogenous	88.33	73	110	17.5	mRNA	MAK32	1	1.51515	14.3963	1	12.3999	6.71012	96.7149	127.548	95.7783	112.294	98.6526	92.2917	22.8205	60.9655	29.4334	110.311	79.4432	129.027	48.6232	83.1338	70.3078	78.5566	91.3964	108.591
CNAG_00440	CNAG_00440.1	Endogenous	154.33	128	181	13.12	mRNA	SSN801	76.1803	62.5152	73.3963	68.8715	115.4	88.7101	209.715	195.548	153.778	182.294	127.653	193.292	71.8205	118.965	119.433	145.311	194.443	149.027	106.623	107.134	113.308	129.557	93.3964	149.591
CNAG_00442	CNAG_00442.1	Endogenous	215.17	68	409	65.02	mRNA		166.18	172.515	152.396	313.871	386.4	301.71	45.7149	38.5479	39.7783	49.2938	27.6526	42.2917	69.8205	55.9655	41.4334	80.3111	31.4432	116.027	40.6232	52.1338	55.3078	108.557	71.3964	83.5911
CNAG_00444	CNAG_00444.1	Endogenous	1037.33	693	1475	25.66	mRNA		352.18	352.515	232.396	298.871	335.4	208.71	578.715	839.548	563.778	421.294	329.653	502.292	285.82	361.965	365.433	207.311	648.443	241.027	323.623	331.134	324.308	234.557	184.396	266.591
CNAG_00483	CNAG_00483.1	Endogenous	2301.17	1588	3735	33.62	mRNA	ACT1	9300.18	10372.5	7684.4	7936.87	10185.4	6822.71	8764.71	9522.55	7813.78	7754.29	6823.65	8822.29	7047.82	8258.97	7769.43	7069.31	7273.44	7542.03	7048.62	7743.13	6973.31	6612.56	5113.4	6392.59
CNAG_00519	CNAG_00519.1	Endogenous	612.67	343	1060	40.96	mRNA	ERG3	1343.18	1506.52	1158.4	982.871	1266.4	867.71	995.715	961.548	864.778	988.294	810.653	996.292	938.82	1246.97	1273.43	1189.31	1512.44	1147.03	1058.62	1061.13	932.308	988.557	927.396	1081.59
CNAG_00777	CNAG_00777.1	Endogenous	637.83	358	921	33.77	mRNA		1024.18	1138.52	885.396	840.871	889.4	701.71	1414.71	1497.55	1256.78	1110.29	943.653	1177.29	1371.82	1344.97	1367.43	1162.31	1241.44	1192.03	1173.62	1114.13	1090.31	1205.56	970.396	1009.59
CNAG_00816	CNAG_00816.1	Endogenous	11893.2	8843	18199	30.33	mRNA		1905.18	2143.52	1402.4	2655.87	3432.4	1987.71	5983.71	9835.55	5498.78	7595.29	6666.65	8175.29	2659.82	3858.97	4217.43	3037.31	7316.44	2750.03	4258.62	4574.13	4175.31	3428.56	3261.4	4007.59
CNAG_00834	CNAG_00834.1	Endogenous	218.67	72	429	67.99	mRNA		32.1803	62.5152	47.3963	344.871	388.4	280.71	2217.71	2537.55	2741.78	3100.29	3074.65	3797.29	211.82	262.965	340.433	133.311	375.443	211.027	329.623	334.134	393.308	341.557	390.396	421.591
CNAG_00866	CNAG_00866.1	Endogenous	1913	822	3518	57.11	mRNA		3836.18	5062.52	3799.4	2998.87	4078.4	2726.71	12489.7	15194.5	12787.8	16537.3	15502.7	20420.3	7922.82	9796.97	10324.4	5320.31	7090.44	4786.03	9550.62	11109.1	10427.3	6749.56	6033.4	7527.59
CNAG_00883	CNAG_00883.1	Endogenous	1027.83	671	1320	26.04	mRNA	ECM2201	1355.18	1556.52	1133.4	2921.87	3619.4	2486.71	691.715	625.548	500.778	955.294	752.653	1047.29	515.82	496.965	532.433	1535.31	1717.44	1459.03	474.623	385.134	376.308	1328.56	1012.4	1248.59
CNAG_00897	CNAG_00897.1	Endogenous	7486.33	5894	9104	18.24	mRNA	SKN1	14427.2	16205.5	11241.4	13789.9	15973.4	11247.7	17115.7	17683.5	14139.8	13375.3	10869.7	14264.3	12986.8	14588	15117.4	13713.3	20265.4	13444	14111.6	13416.1	12483.3	14039.6	11124.4	13355.6
CNAG_01075	CNAG_01075.1	Endogenous	27.17	23	35	17.17	mRNA		5.18028	1	1	1	7.3999	9.71012	26.7149	14.5479	34.7783	33.2938	5.65263	16.2917	18.8205	53.9655	15.4334	47.3111	50.4432	47.0273	30.6232	40.1338	19.3078	19.5566	30.3964	22.5911
CNAG_01242	CNAG_01242.1	Endogenous	609.17	382	915	32.76	mRNA	HAPX	1171.18	1310.52	1003.4	1154.87	1311.4	1023.71	1192.71	1079.55	1041.78	1503.29	1220.65	1462.29	777.82	986.965	1022.43	1157.31	1250.44	1119.03	1042.62	1156.13	1132.31	1466.56	1212.4	1351.59
CNAG_01243	CNAG_01243.1	Endogenous	278.5	204	369	20.17	mRNA	SET101	665.18	729.515	527.396	622.871	711.4	496.71	487.715	363.548	414.778	441.294	405.653	454.292	313.82	355.965	382.433	403.311	465.443	413.027	317.623	331.134	285.308	418.557	324.396	445.591
CNAG_01341	CNAG_01341.1	Endogenous	1406.17	818	2151	42.43	mRNA	ISP3	397.18	432.515	362.396	395.871	579.4	370.71	2090.71	2933.55	2316.78	2985.29	2442.65	3358.29	711.82	971.965	1053.43	428.311	645.443	462.027	1108.62	1248.13	1157.31	883.557	817.396	951.591
CNAG_01463	CNAG_01463.1	Endogenous	452.67	309	672	29.27	mRNA		182.18	204.515	143.396	202.871	256.4	178.71	327.715	329.548	272.778	318.294	293.653	332.292	177.82	234.965	215.433	310.311	405.443	314.027	183.623	172.134	175.308	312.557	290.396	228.591
CNAG_01464	CNAG_01464.1	Endogenous	163	76	297	52.6	mRNA	FHB1	174.18	184.515	123.396	126.871	194.4	105.71	3043.71	3453.55	2402.78	3929.29	3092.65	3888.29	3498.82	3800.97	4024.43	1739.31	2916.44	2213.03	2972.62	2892.13	2731.31	2419.56	2082.4	2778.59
CNAG_01469	CNAG_01469.1	Endogenous	199.67	161	242	14.18	mRNA		843.18	849.515	601.396	767.871	866.4	653.71	570.715	589.548	500.778	451.294	443.653	562.292	625.82	521.965	486.433	751.311	553.443	748.027	473.623	426.134	450.308	796.557	582.396	615.591
CNAG_01477	CNAG_01477.1	Endogenous	630.17	507	804	21.22	mRNA		2479.18	2965.52	1972.4	2377.87	2989.4	2032.71	1640.71	1563.55	1338.78	1631.29	1438.65	1574.29	1394.82	1713.97	1598.43	2000.31	2123.44	2006.03	1395.62	1439.13	1287.31	1791.56	1454.4	1789.59
CNAG_01487	CNAG_01487.1	Endogenous	55	41	77	24.64	mRNA		1	17.5152	14.3963	11.8715	20.3999	8.71012	40.7149	37.5479	40.7783	89.2938	64.6526	119.292	70.8205	73.9655	70.4334	74.3111	78.4432	104.027	73.6232	68.1338	48.3078	67.5566	51.3964	50.5911
CNAG_01542	CNAG_01542.1	Endogenous	1594.67	1033	2801	40.1	mRNA		212.18	278.515	238.396	134.871	197.4	130.71	426.715	555.548	357.778	597.294	488.653	580.292	431.82	598.965	673.433	691.311	942.443	692.027	568.623	685.134	606.308	712.557	745.396	809.591
CNAG_01737	CNAG_01737.1	Endogenous	2355.67	1465	4013	39.2	mRNA	ERG25	4054.18	5059.52	3650.4	3366.87	3984.4	3037.71	4431.71	4418.55	3605.78	4167.29	3220.65	4443.29	6918.82	7331.97	6793.43	7039.31	6025.44	7727.03	5410.62	5237.13	5009.31	6815.56	4676.4	5654.59
CNAG_01810	CNAG_01810.1	Endogenous	304.83	89	524	69.4	mRNA		197.18	192.515	164.396	130.871	229.4	138.71	486.715	519.548	407.778	533.294	362.653	522.292	668.82	601.965	629.433	676.311	966.443	609.027	447.623	438.134	384.308	517.557	324.396	445.591
CNAG_01882	CNAG_01882.1	Endogenous	153.33	100	223	27.99	mRNA		154.18	194.515	134.396	144.871	172.4	147.71	124.715	121.548	86.7783	60.2938	52.6526	66.2917	67.8205	71.9655	56.4334	63.3111	90.4432	48.0273	78.6232	64.1338	33.3078	78.5566	61.3964	74.5911
CNAG_01945	CNAG_01945.1	Endogenous	87.67	70	115	19.35	mRNA		1	1	1	1	1	1	35.7149	21.5479	34.7783	41.2938	33.6526	39.2917	1	7.9655	1	1	34.4432	9.02734	3.62323	1	16.3078	1	1	1.5911
CNAG_02045	CNAG_02045.1	Endogenous	75.5	31	107	39.29	mRNA		149.18	195.515	94.3963	138.871	160.4	141.71	31.7149	37.5479	20.7783	9.29382	1	1	39.8205	85.9655	43.4334	27.3111	40.4432	21.0273	70.6232	83.1338	84.3078	11.5566	9.39644	35.5911
CNAG_02060	CNAG_02060.1	Endogenous	247.33	136	382	37.82	mRNA		2671.18	2728.52	2170.4	2380.87	2887.4	2206.71	182.715	111.548	122.778	60.2938	18.6526	75.2917	225.82	218.965	204.433	287.311	147.443	242.027	101.623	99.1338	81.3078	186.557	91.3964	152.591
CNAG_02095	CNAG_02095.1	Endogenous	524	352	724	27.37	mRNA		1440.18	1520.52	1225.4	1108.87	1370.4	915.71	1270.71	1296.55	1031.78	929.294	859.653	1058.29	332.82	452.965	428.433	292.311	313.443	300.027	295.623	302.134	275.308	203.557	172.396	234.591
CNAG_02288	CNAG_02288.1	Endogenous	71.17	58	91	19.6	mRNA		34.1803	47.5152	36.3963	126.871	118.4	139.71	46.7149	38.5479	60.7783	72.2938	138.653	43.2917	276.82	472.965	393.433	252.311	364.443	574.027	506.623	571.134	534.308	104.557	80.3964	265.591
CNAG_02455	CNAG_02455.1	Endogenous	568.83	241	1000	51.45	mRNA		921.18	1048.52	766.396	1500.87	1775.4	1149.71	929.715	987.548	758.778	1827.29	1700.65	2169.29	1386.82	1276.97	1227.43	2286.31	1849.44	2518.03	1038.62	963.134	966.308	2340.56	1521.4	1915.59
CNAG_02487	CNAG_02487.1	Endogenous	141.33	115	199	23	mRNA	PHS1	264.18	291.515	207.396	268.871	344.4	276.71	235.715	275.548	224.778	230.294	217.653	267.292	276.82	394.965	391.433	303.311	225.443	334.027	345.623	406.134	370.308	307.557	279.396	360.591
CNAG_02491	CNAG_02491.1	Endogenous	130.17	94	163	17.3	mRNA		404.18	516.515	329.396	314.871	334.4	244.71	113.715	109.548	78.7783	97.2938	59.6526	94.2917	103.82	131.965	112.433	128.311	156.443	116.027	112.623	78.1338	50.3078	86.5566	58.3964	86.5911
CNAG_02532	CNAG_02532.1	Endogenous	477.5	229	801	47.28	mRNA		151.18	178.515	144.396	578.871	784.4	457.71	378.715	454.548	285.778	515.294	485.653	552.292	190.82	296.965	262.433	712.311	691.443	630.027	246.623	240.134	203.308	560.557	406.396	549.591
CNAG_02553	CNAG_02553.1	Endogenous	94.17	76	123	23.05	mRNA		19.1803	7.51515	23.3963	65.8715	72.3999	49.7101	98.7149	123.548	117.778	73.2938	61.6526	121.292	57.8205	93.9655	83.4334	52.3111	107.443	59.0273	75.6232	56.1338	60.3078	40.5566	32.3964	44.5911
CNAG_02722	CNAG_02722.1	Endogenous	1138.5	668	1665	34.49	mRNA		2038.18	2541.52	1711.4	1882.87	2346.4	1550.71	8562.71	10505.5	8557.78	8562.29	7614.65	10003.3	5959.82	6054.97	6098.43	3946.31	6078.44	4077.03	5427.62	5506.13	5286.31	4998.56	3860.4	4626.59
CNAG_02751	CNAG_02751.1	Endogenous	2179.67	587	4144	77.01	mRNA		549.18	808.515	582.396	1492.87	1949.4	1026.71	23491.7	30679.5	28242.8	66792.3	66542.7	89282.3	9891.82	12783	15994.4	11273.3	23787.4	13004	16104.6	19233.1	18679.3	16202.6	15865.4	19161.6
CNAG_02781	CNAG_02781.1	Endogenous	74.17	61	103	20.33	mRNA		72.1803	55.5152	43.3963	422.871	509.4	318.71	202.715	270.548	205.778	916.294	804.653	1053.29	48.8205	74.9655	92.4334	265.311	427.443	225.027	56.6232	53.1338	71.3078	172.557	147.396	211.591
CNAG_02849	CNAG_02849.1	Endogenous	60.67	45	76	22.71	mRNA		1	1	16.3963	71.8715	118.4	57.7101	14.7149	5.54786	8.77828	4.29382	1	2.29172	2.82046	21.9655	11.4334	7.31106	1	1	1	1	11.3078	1	1	1
CNAG_02991	CNAG_02991.1	Endogenous	8417.5	6381	9704	14.34	mRNA		8827.18	10320.5	6700.4	9527.87	11155.4	7518.71	12952.7	15513.5	11995.8	12451.3	11389.7	14914.3	7623.82	8977.97	8770.43	8947.31	14633.4	8252.03	7762.62	7696.13	7307.31	8506.56	6816.4	7912.59
CNAG_03050	CNAG_03050.1	Endogenous	135.83	91	168	25.41	mRNA		45.1803	70.5152	50.3963	77.8715	98.3999	59.7101	96.7149	114.548	82.7783	113.294	85.6526	132.292	42.8205	55.9655	73.4334	44.3111	117.443	97.0273	83.6232	65.1338	69.3078	79.5566	82.3964	106.591
CNAG_03080	CNAG_03080.1	Endogenous	804.5	560	1372	38.52	mRNA		3437.18	3791.52	2862.4	2989.87	3323.4	2738.71	2781.71	2601.55	2124.78	2975.29	2389.65	3074.29	2465.82	2510.97	2446.43	3256.31	3661.44	3040.03	2077.62	1819.13	1685.31	2995.56	2272.4	2478.59
CNAG_03129	CNAG_03129.1	Endogenous	465.5	352	713	28	mRNA		475.18	521.515	404.396	431.871	544.4	387.71	764.715	792.548	565.778	598.294	459.653	726.292	878.82	916.965	914.433	846.311	1054.44	711.027	786.623	738.134	690.308	679.557	523.396	647.591
CNAG_03159	CNAG_03159.1	Endogenous	359.17	219	462	25.23	mRNA		244.18	320.515	209.396	257.871	368.4	282.71	508.715	664.548	420.778	555.294	509.653	602.292	395.82	497.965	439.433	505.311	953.443	462.027	380.623	376.134	332.308	445.557	346.396	413.591
CNAG_03227	CNAG_03227.1	Endogenous	1069	619	1577	37.25	mRNA		243.18	248.515	208.396	379.871	517.4	291.71	409.715	484.548	351.778	505.294	405.653	413.292	248.82	315.965	328.433	216.311	216.443	207.027	279.623	356.134	311.308	247.557	192.396	247.591
CNAG_03284	CNAG_03284.1	Endogenous	344.83	221	489	36.04	mRNA		342.18	419.515	276.396	330.871	405.4	282.71	525.715	565.548	407.778	483.294	300.653	548.292	716.82	754.965	668.433	661.311	896.443	577.027	598.623	578.134	534.308	561.557	391.396	439.591
CNAG_03302	CNAG_03302.1	Endogenous	164.17	79	301	55.86	mRNA		242.18	235.515	236.396	190.871	219.4	197.71	316.715	283.548	276.778	290.294	238.653	334.292	378.82	449.965	431.433	334.311	362.443	316.027	378.623	279.134	290.308	288.557	215.396	271.591
CNAG_03346	CNAG_03346.1	Endogenous	230.17	96	423	61.64	mRNA	BZP4	384.18	402.515	278.396	97.8715	170.4	124.71	177.715	226.548	164.778	81.2938	75.6526	46.2917	248.82	375.965	348.433	124.311	273.443	135.027	291.623	335.134	280.308	99.5566	90.3964	91.5911
CNAG_03358	CNAG_03358.1	Endogenous	1557.5	969	2430	33.67	mRNA		5037.18	5284.52	3970.4	4357.87	5375.4	3772.71	6196.71	6758.55	5252.78	6291.29	5432.65	6928.29	6288.82	6649.97	6551.43	6096.31	6178.44	6296.03	6137.62	6266.13	5725.31	6287.56	5584.4	6546.59
CNAG_03369	CNAG_03369.1	Endogenous	118.17	76	148	26.17	mRNA	SWE102	1271.18	1467.52	1138.4	975.871	1049.4	815.71	138.715	154.548	136.778	84.2938	32.6526	72.2917	125.82	118.965	121.433	98.3111	106.443	113.027	110.623	89.1338	100.308	93.5566	75.3964	75.5911
CNAG_03385	CNAG_03385.1	Endogenous	4438.83	2205	8036	51.3	mRNA	PCL103	8838.18	9986.52	6911.4	7379.87	7860.4	6423.71	22085.7	21398.5	18466.8	20320.3	18131.7	24409.3	14783.8	14443	14669.4	14798.3	20553.4	16000	4751.62	3881.13	3628.31	3898.56	2817.4	3408.59
CNAG_03474	CNAG_03474.1	Endogenous	64.5	29	122	61.24	mRNA		23.1803	15.5152	19.3963	1	22.3999	30.7101	61.7149	86.5479	55.7783	74.2938	17.6526	44.2917	90.8205	113.965	75.4334	104.311	92.4432	88.0273	91.6232	83.1338	70.3078	76.5566	52.3964	101.591
CNAG_03495	CNAG_03495.1	Endogenous	54.83	25	100	49.84	mRNA		25.1803	28.5152	35.3963	113.871	172.4	91.7101	707.715	875.548	1037.78	869.294	842.653	1249.29	77.8205	140.965	126.433	62.3111	70.4432	63.0273	145.623	206.134	168.308	115.557	115.396	138.591
CNAG_03526	CNAG_03526.1	Endogenous	107.17	84	145	22.67	mRNA		383.18	465.515	323.396	327.871	346.4	248.71	113.715	124.548	101.778	104.294	84.6526	107.292	133.82	146.965	105.433	174.311	149.443	135.027	86.6232	89.1338	96.3078	98.5566	80.3964	100.591
CNAG_03567	CNAG_03567.1	Endogenous	671.33	510	880	20.42	mRNA	CBK1	1845.18	2208.52	1395.4	1931.87	2145.4	1689.71	1	1	1	1	1	3.29172	1	1	1	1	1	1	1	1	1	1	1	1
CNAG_03819	CNAG_03819.1	Endogenous	776.5	666	857	8.14	mRNA	ERG6	2468.18	2928.52	1909.4	2016.87	2480.4	1879.71	1872.71	1920.55	1516.78	1255.29	962.653	1313.29	1589.82	1955.97	1783.43	1836.31	2652.44	1845.03	1416.62	1343.13	1200.31	1247.56	999.396	1227.59
CNAG_03910	CNAG_03910.1	Endogenous	304	256	378	15.37	mRNA	ITR6	5989.18	6695.52	4499.4	2947.87	3368.4	2553.71	1392.71	1413.55	1430.78	483.294	544.653	480.292	1684.82	2293.97	2135.43	851.311	1257.44	1119.03	2495.62	2504.13	2507.31	584.557	549.396	824.591
CNAG_04096	CNAG_04096.1	Endogenous	112.33	89	153	22.88	mRNA		91.1803	82.5152	78.3963	122.871	149.4	101.71	239.715	242.548	211.778	202.294	155.653	232.292	153.82	97.9655	125.433	101.311	121.443	162.027	127.623	103.134	104.308	133.557	83.3964	75.5911
CNAG_04098	CNAG_04098.1	Endogenous	869.67	245	1600	70.38	mRNA	PDR5-2	2198.18	2819.52	2174.4	1212.87	1373.4	963.71	5399.71	5118.55	4592.78	6552.29	5972.65	7383.29	6446.82	7401.97	7378.43	7203.31	9417.44	7425.03	7161.62	7032.13	6769.31	6988.56	5980.4	6910.59
CNAG_04213	CNAG_04213.1	Endogenous	679.5	509	947	24.03	mRNA		3104.18	3384.52	2407.4	2883.87	3251.4	2462.71	1071.71	892.548	839.778	769.294	611.653	751.292	926.82	928.965	872.433	1137.31	1108.44	1046.03	650.623	558.134	551.308	985.557	679.396	770.591
CNAG_04216	CNAG_04216.1	Endogenous	32.5	21	41	23.41	mRNA		1	1	1	1	1	1	1	1	1	1	1	1	1	1	1	1	1	1	1	1	1	1	1	1
CNAG_04243	CNAG_04243.1	Endogenous	277.17	185	370	24.17	mRNA	CDC24	1562.18	1534.52	1194.4	1277.87	1497.4	1088.71	657.715	629.548	480.778	464.294	419.653	453.292	817.82	791.965	773.433	812.311	685.443	708.027	711.623	665.134	649.308	705.557	573.396	628.591
CNAG_04256	CNAG_04256.1	Endogenous	397.33	344	492	14.65	mRNA	LPI6	182.18	197.515	139.396	236.871	275.4	186.71	454.715	542.548	477.778	378.294	341.653	405.292	242.82	323.965	353.433	218.311	256.443	223.027	368.623	429.134	384.308	305.557	257.396	310.591
CNAG_04283	CNAG_04283.1	Endogenous	1507.33	975	2202	29.16	mRNA		1465.18	1684.52	1355.4	2123.87	2550.4	1779.71	2869.71	2853.55	2678.78	3337.29	2937.65	4688.29	1945.82	2012.97	2054.43	2376.31	3336.44	2429.03	1723.62	1607.13	1621.31	2362.56	1679.4	2002.59
CNAG_04346	CNAG_04346.1	Endogenous	70.33	60	75	7.82	mRNA		71.1803	83.5152	60.3963	56.8715	76.3999	46.7101	138.715	129.548	132.778	85.2938	88.6526	98.2917	78.8205	84.9655	68.4334	71.3111	80.4432	100.027	57.6232	84.1338	55.3078	76.5566	45.3964	85.5911
CNAG_04355	CNAG_04355.1	Endogenous	143.67	56	290	66.77	mRNA		173.18	177.515	136.396	141.871	183.4	153.71	376.715	332.548	326.778	411.294	282.653	464.292	281.82	319.965	273.433	319.311	522.443	278.027	214.623	164.134	138.308	225.557	147.396	174.591
CNAG_04417	CNAG_04417.1	Endogenous	564.5	348	912	39.27	mRNA		476.18	526.515	377.396	1235.87	1279.4	952.71	599.715	577.548	469.778	3309.29	3085.65	4291.29	645.82	617.965	591.433	2807.31	3710.44	3190.03	509.623	446.134	438.308	1703.56	1275.4	1610.59
CNAG_04453	CNAG_04453.1	Endogenous	94.17	62	133	27.84	mRNA	IPC1	521.18	557.515	381.396	495.871	595.4	411.71	148.715	142.548	146.778	101.294	110.653	125.292	85.8205	132.965	89.4334	175.311	96.4432	199.027	99.6232	103.134	115.308	223.557	186.396	190.591
CNAG_04496	CNAG_04496.1	Endogenous	389.83	316	475	16.16	mRNA		2606.18	2993.52	2090.4	2011.87	2563.4	1773.71	562.715	493.548	441.778	421.294	308.653	398.292	721.82	711.965	635.433	863.311	733.443	784.027	593.623	491.134	497.308	805.557	622.396	726.591
CNAG_04655	CNAG_04655.1	Endogenous	284.5	173	460	36.93	mRNA		426.18	447.515	342.396	389.871	560.4	426.71	331.715	317.548	241.778	332.294	265.653	417.292	124.82	181.965	184.433	188.311	284.443	201.027	165.623	135.134	116.308	171.557	118.396	187.591
CNAG_04804	CNAG_04804.1	Endogenous	1119.5	855	1733	28.59	mRNA	SRE1	1452.18	1836.52	1306.4	1653.87	1992.4	1433.71	1693.71	1728.55	1505.78	1844.29	1561.65	1898.29	1276.82	1891.97	1907.43	1832.31	2121.44	1746.03	1818.62	1883.13	1709.31	1802.56	1574.4	2030.59
CNAG_04899	CNAG_04899.1	Endogenous	439.5	228	669	43.85	mRNA		678.18	778.515	514.396	756.871	887.4	617.71	1267.71	1340.55	1063.78	1342.29	1145.65	1689.29	1226.82	1310.97	1254.43	1697.31	1908.44	1360.03	965.623	864.134	892.308	1505.56	922.396	1174.59
CNAG_04951	CNAG_04951.1	Endogenous	499	421	629	15.6	mRNA		718.18	832.515	661.396	1383.87	1769.4	1224.71	1012.71	977.548	830.778	1252.29	997.653	1544.29	1115.82	1047.97	1066.43	2481.31	1974.44	2188.03	774.623	743.134	687.308	1995.56	1218.4	1621.59
CNAG_05077	CNAG_05077.1	Endogenous	312.17	105	614	69.15	mRNA	LPI11	736.18	808.515	654.396	424.871	612.4	390.71	2185.71	2625.55	2197.78	1905.29	1684.65	2283.29	1096.82	1318.97	1483.43	476.311	802.443	459.027	1314.62	1440.13	1396.31	752.557	741.396	900.591
CNAG_05159	CNAG_05159.1	Endogenous	4739.33	2628	8130	45.25	mRNA		1731.18	1807.52	1320.4	3090.87	3446.4	2554.71	2356.71	2957.55	2033.78	3146.29	2669.65	3231.29	977.82	1259.97	1230.43	1969.31	3364.44	1995.03	1398.62	1305.13	1168.31	2087.56	1785.4	2159.59
CNAG_05303	CNAG_05303.1	Endogenous	23.33	20	27	15.73	mRNA	ICL1	90.1803	142.515	79.3963	83.8715	119.4	170.71	39.7149	24.5479	50.7783	46.2938	112.653	1	788.82	951.965	905.433	426.311	426.443	912.027	964.623	980.134	1092.31	128.557	115.396	378.591
CNAG_05333	CNAG_05333.1	Endogenous	18	12	33	43.18	mRNA		244.18	224.515	200.396	229.871	278.4	204.71	362.715	353.548	301.778	294.294	240.653	259.292	102.82	153.965	162.433	101.311	157.443	141.027	159.623	155.134	153.308	150.557	107.396	150.591
CNAG_05387	CNAG_05387.1	Endogenous	206.17	143	308	29.6	mRNA		2028.18	2292.52	1775.4	1850.87	2170.4	1514.71	1062.71	1141.55	931.778	746.294	689.653	752.292	1426.82	1736.97	1639.43	1448.31	1517.44	1452.03	1850.62	1902.13	1779.31	1167.56	1015.4	1262.59
CNAG_05451	CNAG_05451.1	Endogenous	337.67	305	383	9.33	mRNA		438.18	488.515	323.396	441.871	526.4	370.71	287.715	296.548	240.778	255.294	231.653	299.292	211.82	269.965	238.433	274.311	378.443	352.027	207.623	234.134	220.308	261.557	229.396	325.591
CNAG_05551	CNAG_05551.1	Endogenous	111	86	160	23.41	mRNA		393.18	416.515	305.396	290.871	341.4	279.71	169.715	192.548	127.778	121.294	93.6526	105.292	98.8205	153.965	128.433	109.311	129.443	90.0273	102.623	93.1338	105.308	116.557	67.3964	103.591
CNAG_05558	CNAG_05558.1	Endogenous	325	245	406	18.23	mRNA	KIN4	1450.18	1532.52	1079.4	1087.87	1174.4	1009.71	763.715	733.548	679.778	619.294	573.653	673.292	691.82	710.965	719.433	790.311	949.443	767.027	583.623	439.134	427.308	661.557	508.396	618.591
CNAG_05571	CNAG_05571.1	Endogenous	468.83	217	860	54.04	mRNA		2587.18	2897.52	2328.4	2933.87	3321.4	2496.71	2150.71	1894.55	1693.78	2557.29	2161.65	2767.29	3440.82	3584.97	3279.43	4869.31	4007.44	4492.03	2620.62	2414.13	2318.31	3814.56	2659.4	3195.59
CNAG_05678	CNAG_05678.1	Endogenous	853.5	421	1675	58.93	mRNA		1538.18	1748.52	1220.4	1825.87	2179.4	1630.71	1430.71	1547.55	1194.78	1500.29	1392.65	1696.29	1625.82	2265.97	2350.43	2145.31	3141.44	2182.03	1993.62	1880.13	1876.31	1470.56	1162.4	1605.59
CNAG_05692	CNAG_05692.1	Endogenous	225.17	189	282	14.51	mRNA	LCB3	574.18	624.515	449.396	468.871	602.4	400.71	389.715	376.548	287.778	270.294	249.653	317.292	379.82	480.965	403.433	499.311	425.443	500.027	402.623	418.134	393.308	410.557	345.396	399.591
CNAG_05755	CNAG_05755.1	Endogenous	783.17	367	1306	53.71	mRNA		1346.18	1488.52	1092.4	1265.87	1508.4	1046.71	2057.71	2156.55	1669.78	1891.29	1409.65	2364.29	3061.82	3273.97	2746.43	3266.31	3285.44	2930.03	2345.62	2213.13	2026.31	2637.56	1863.4	2130.59
CNAG_05757	CNAG_05757.1	Endogenous	632.67	332	987	43.1	mRNA		480.18	553.515	376.396	448.871	528.4	374.71	984.715	1059.55	774.778	899.294	584.653	1154.29	1123.82	1285.97	1368.43	1046.31	1540.44	766.027	1129.62	1010.13	899.308	772.557	640.396	741.591
CNAG_05835	CNAG_05835.1	Endogenous	1968.17	1415	2432	20.38	mRNA	LIV3	2429.18	2650.52	1975.4	5389.87	6021.4	4491.71	2280.71	2358.55	1982.78	3842.29	3042.65	5006.29	2992.82	2784.97	2807.43	4714.31	4740.44	5123.03	2354.62	2139.13	2069.31	4301.56	3019.4	3515.59
CNAG_05968	CNAG_05968.1	Endogenous	301.17	148	432	30.04	mRNA	CDC420	456.18	517.515	379.396	364.871	490.4	330.71	254.715	347.548	196.778	220.294	140.653	233.292	315.82	334.965	290.433	363.311	395.443	292.027	249.623	231.134	257.308	304.557	153.396	202.591
CNAG_06092	CNAG_06092.1	Endogenous	3496.83	2826	4215	15.18	mRNA	CLN1	9404.18	11140.5	8111.4	9447.87	11193.4	7749.71	11018.7	10265.5	8426.78	7902.29	6793.65	8105.29	12675.8	12460	11580.4	10915.3	11952.4	10965	8516.62	7649.13	7297.31	7562.56	5794.4	6615.59
CNAG_06125	CNAG_06125.1	Endogenous	17499.3	9554	28842	41.26	mRNA	TEF1	64690.2	77512.5	58348.4	66622.9	75596.4	60074.7	82902.7	78360.5	73661.8	69105.3	60796.7	80272.3	78604.8	85308	76289.4	98181.3	107721	108321	63503.6	61629.1	57642.3	79271.6	62402.4	75878.6
CNAG_06165	CNAG_06165.1	Endogenous	302.67	257	364	14.88	mRNA		472.18	459.515	340.396	464.871	526.4	345.71	513.715	511.548	427.778	470.294	410.653	513.292	351.82	428.965	411.433	423.311	557.443	385.027	424.623	443.134	437.308	402.557	390.396	481.591
CNAG_06169	CNAG_06169.1	Endogenous	431	153	896	67.63	mRNA		538.18	775.515	587.396	729.871	954.4	606.71	5665.71	6922.55	6534.78	8650.29	8336.65	10848.3	1787.82	2310.97	2456.43	1026.31	1763.44	1186.03	2390.62	2679.13	2542.31	1785.56	1670.4	1938.59
CNAG_06182	CNAG_06182.1	Endogenous	119.5	81	161	28.46	mRNA		994.18	1202.52	743.396	854.871	1020.4	753.71	376.715	352.548	287.778	300.294	220.653	324.292	381.82	461.965	401.433	439.311	505.443	472.027	317.623	297.134	249.308	353.557	251.396	328.591
CNAG_06252	CNAG_06252.1	Endogenous	328.83	156	540	54.7	mRNA	CCD6	384.18	422.515	372.396	276.871	355.4	294.71	730.715	729.548	556.778	753.294	579.653	785.292	842.82	951.965	875.433	829.311	1146.44	763.027	717.623	706.134	616.308	689.557	484.396	615.591
CNAG_06291	CNAG_06291.1	Endogenous	120.67	54	214	59.87	mRNA	FPD1	1	19.5152	19.3963	52.8715	91.3999	62.7101	506.715	673.548	738.778	459.294	427.653	567.292	169.82	204.965	305.433	128.311	182.443	174.027	329.623	397.134	393.308	239.557	204.396	272.591
CNAG_06373	CNAG_06373.1	Endogenous	126.17	83	183	32.71	mRNA		59.1803	62.5152	38.3963	72.8715	85.3999	42.7101	170.715	192.548	175.778	229.294	222.653	330.292	185.82	211.965	200.433	240.311	354.443	250.027	137.623	163.134	135.308	195.557	131.396	198.591
CNAG_06499	CNAG_06499.1	Endogenous	719.17	552	908	20.76	mRNA	DPP101	1011.18	1152.52	793.396	798.871	1029.4	636.71	971.715	950.548	818.778	545.294	541.653	556.292	640.82	792.965	727.433	534.311	617.443	542.027	764.623	793.134	665.308	536.557	443.396	576.591
CNAG_06529	CNAG_06529.1	Endogenous	88	51	114	32.68	mRNA		52.1803	93.5152	57.3963	158.871	166.4	93.7101	162.715	181.548	123.778	107.294	131.653	154.292	70.8205	52.9655	65.4334	113.311	135.443	135.027	73.6232	58.1338	36.3078	77.5566	54.3964	98.5911
CNAG_06534	CNAG_06534.1	Endogenous	221	159	313	24.62	mRNA	HMG1	1160.18	1206.52	968.396	1152.87	1401.4	1088.71	573.715	510.548	494.778	567.294	468.653	676.292	674.82	825.965	734.433	816.311	774.443	761.027	618.623	591.134	533.308	702.557	497.396	616.591
CNAG_06583	CNAG_06583.1	Endogenous	56	47	65	11.63	mRNA		425.18	542.515	335.396	353.871	388.4	296.71	80.7149	109.548	95.7783	93.2938	157.653	99.2917	145.82	225.965	198.433	231.311	394.443	426.027	189.623	188.134	164.308	84.5566	80.3964	133.591
CNAG_06699	CNAG_06699.1	Endogenous	12932.5	7570	20862	37.84	mRNA	GPD1	32223.2	34859.5	25325.4	33428.9	40126.4	27272.7	46497.7	52568.5	40436.8	39135.3	34353.7	43497.3	37099.8	46485	44959.4	39760.3	47429.4	36055	41265.6	41519.1	38844.3	39927.6	33394.4	40094.6
CNAG_06746	CNAG_06746.1	Endogenous	5474.17	4503	6406	14.38	mRNA	H2B	18282.2	18772.5	14313.4	11733.9	13057.4	9906.71	10460.7	11918.5	9402.78	7763.29	6611.65	8400.29	6879.82	7635.97	7893.43	6585.31	9672.44	5537.03	6456.62	6048.13	5849.31	5701.56	4298.4	4956.59
CNAG_06829	CNAG_06829.1	Endogenous	429.5	283	636	28.76	mRNA	ERG1	431.18	481.515	337.396	551.871	638.4	506.71	597.715	604.548	454.778	674.294	441.653	594.292	532.82	558.965	605.433	862.311	796.443	812.027	525.623	524.134	508.308	834.557	703.396	912.591
CNAG_06916	CNAG_06916.1	Endogenous	219.67	62	398	74.24	mRNA		401.18	493.515	367.396	379.871	531.4	335.71	1525.71	1561.55	1246.78	1641.29	1417.65	1924.29	1602.82	1931.97	2064.43	1548.31	2538.44	1357.03	1692.62	1491.13	1405.31	1404.56	1019.4	1304.59
CNAG_07316	CNAG_07316.1	Endogenous	313.5	215	472	29.98	mRNA		296.18	352.515	253.396	361.871	382.4	298.71	563.715	673.548	561.778	465.294	427.653	540.292	435.82	557.965	579.433	371.311	545.443	464.027	495.623	572.134	506.308	340.557	281.396	358.591
CNAG_07358	CNAG_07358.1	Endogenous	618.17	453	828	22.27	mRNA		366.18	318.515	233.396	480.871	615.4	412.71	242.715	293.548	213.778	268.294	194.653	378.292	120.82	188.965	178.433	197.311	265.443	202.027	132.623	174.134	146.308	168.557	170.396	226.591
CNAG_07730	CNAG_07730.1	Endogenous	57.33	45	66	13.54	mRNA		22.1803	44.5152	29.3963	20.8715	20.3999	27.7101	49.7149	34.5479	49.7783	82.2938	13.6526	65.2917	43.8205	59.9655	50.4334	77.3111	51.4432	73.0273	40.6232	57.1338	43.3078	53.5566	61.3964	77.5911
CNAG_07749	CNAG_07749.1	Endogenous	293.17	256	335	11.79	mRNA		312.18	409.515	255.396	319.871	316.4	284.71	467.715	570.548	455.778	456.294	455.653	484.292	377.82	424.965	419.433	358.311	455.443	392.027	357.623	412.134	366.308	439.557	351.396	407.591
CNAG_07799	CNAG_07799.1	Endogenous	1048.33	199	2602	87.64	mRNA		66.1803	82.5152	74.3963	415.871	531.4	338.71	128.715	150.548	105.778	188.294	136.653	184.292	83.8205	89.9655	95.4334	183.311	178.443	163.027	84.6232	106.134	88.3078	212.557	137.396	206.591
CNAG_07873	CNAG_07873.1	Endogenous	595.17	333	1001	44.2	mRNA		1747.18	1975.52	1395.4	1365.87	1622.4	1253.71	1061.71	987.548	814.778	635.294	460.653	572.292	1246.82	1329.97	1247.43	980.311	1109.44	931.027	1067.62	953.134	832.308	752.557	546.396	670.591
CNAG_07902	CNAG_07902.1	Endogenous	835.5	436	1365	42.2	mRNA		1064.18	1161.52	806.396	1142.87	1549.4	1001.71	3277.71	3665.55	3063.78	5119.29	4866.65	6545.29	1822.82	2247.97	2634.43	2476.31	4644.44	2507.03	2503.62	2721.13	2464.31	3675.56	3477.4	4082.59
Total counts									266727	303842	222091	262565	309089	225731	361332	388401	327767	388865	349395	458551	294010	332112	322855	327649	405452	336604	276952	277216	260798	294017	237321	287343		458551
Normalization factor to highest count									0.581675	0.662613	0.484332	0.572599	0.674057	0.492272	0.787987	0.847018	0.71479	0.848031	0.761956	1	0.641173	0.724265	0.704077	0.714531	0.884203	0.734061	0.603972	0.604549	0.568744	0.641189	0.517546	0.626633
									H99 Amb 1	H99 Amb 2	H99 Amb 3	H99 CO2 1	H99 CO2 2	H99 CO2 3	cbk1 Amb 1	cbk1 Amb 2	cbk1 Amb 3	cbk1 CO2 1	cbk1 CO2 2	cbk1 CO2 3	cbk1 sup1 Amb 1	cbk1 sup1 Amb 2	cbk1 sup1 Amb 3	cbk1 sup1 CO2 1	cbk1 sup1 CO2 2	cbk1 sup1 CO2 3	cbk1 sup2 Amb 1	cbk1 sup2 Amb 2	cbk1 sup2 Amb 3	cbk1 sup2 CO2 1	cbk1 sup2 CO2 2	cbk1 sup2 CO2 3
CNAG_00039	CNAG_00039.1	Endogenous	404	255	537	25.93	mRNA	ZFC6	971.643	944.012	965.033	1213.54	1282.38	1342.17	882.901	723.182	801.324	849.372	857.861	945.292	937.064	963.688	898.245	1139.64	800.091	1117.11	896.769	921.569	881.43	1023.97	945.609	953.654
CNAG_00040	CNAG_00040.1	Endogenous	792	609	1088	25.02	mRNA	ERG11	4306.84	4697.33	4687.69	4795.45	5200.45	5094.16	2498.41	2142.28	2405.99	1882.35	1608.56	1951.29	4567.91	3865.94	3646.52	4611.85	2887.85	4435.63	3564.11	3758.4	3749.15	4568.95	3861.29	3941.05
CNAG_00097	CNAG_00097.1	Endogenous	400.67	244	588	30.89	mRNA	ITR1	283.974	275.447	298.135	385.735	402.636	352.875	302.943	321.773	231.926	206.707	175.407	176.292	224.308	240.196	254.849	168.378	178.062	185.308	297.403	271.498	273.072	198.938	172.731	214.785
CNAG_00183	CNAG_00183.1	Endogenous	505	429	676	18.41	mRNA		2542.97	2599.58	2447.49	2203.76	2194.77	2170.98	2051.7	1667.67	1956.91	2586.34	3306.82	2605.29	1807.34	1997.84	1905.24	2050.73	2240.94	2305.02	1726.28	1813.14	1829.13	1427.9	1616.08	1946.26
CNAG_00269	CNAG_00269.1	Endogenous	16.83	11	20	18.18	mRNA		189.419	123.021	161.865	129.011	92.5736	113.169	178.575	249.756	257.108	101.758	100.6	105.292	166.602	231.912	243.487	78.8084	94.371	77.6875	313.96	382.324	332.853	108.481	143.748	141.376
CNAG_00279	CNAG_00279.1	Endogenous	1295.5	1055	1453	11.13	mRNA		2720.04	2444.13	2395.87	2132.16	2227.41	2262.39	2734.45	3337.06	3140.47	2949.53	3331.76	2963.29	2245.6	2414.82	2403.76	2189.28	2938.74	2277.78	2787.59	2863.51	2915.74	2313.76	2613.09	2709.07
CNAG_00331	CNAG_00331.1	Endogenous	716.33	328	1109	43.47	mRNA		815.199	624.067	729.658	2940.75	3381.61	3211.05	211.571	161.21	142.389	317.552	275.151	327.292	102.656	52.4194	82.9929	544.848	274.194	499.996	63.9487	29.9956	30.4316	499.941	379.476	535.546
CNAG_00414	CNAG_00414.1	Endogenous	88.33	73	110	17.5	mRNA	MAK32	1	2.28664	29.7241	1	18.3959	13.6309	122.737	150.585	133.995	132.417	129.473	92.2917	35.5917	84.1757	41.8043	154.382	89.8472	175.772	80.5058	137.514	123.619	122.517	176.596	173.293
CNAG_00440	CNAG_00440.1	Endogenous	154.33	128	181	13.12	mRNA	SSN801	130.967	94.3464	151.541	120.279	171.202	180.206	266.14	230.866	215.138	214.961	167.533	193.292	112.014	164.257	169.631	203.366	219.908	203.018	176.537	177.213	199.225	202.057	180.46	238.722
CNAG_00442	CNAG_00442.1	Endogenous	215.17	68	409	65.02	mRNA		285.693	260.356	314.653	548.153	573.245	612.894	58.0147	45.5101	55.6503	58.1274	36.2916	42.2917	108.895	77.2722	58.8478	112.397	35.561	158.062	67.2601	86.2359	97.2455	169.305	137.952	133.397
CNAG_00444	CNAG_00444.1	Endogenous	1037.33	693	1475	25.66	mRNA		605.459	532.007	479.829	521.956	497.584	423.974	734.422	991.181	788.733	496.791	432.64	502.292	445.777	499.77	519.025	290.136	733.364	328.348	535.825	547.737	570.218	365.815	356.29	425.434
CNAG_00483	CNAG_00483.1	Endogenous	2301.17	1588	3735	33.62	mRNA	ACT1	15988.6	15653.9	15866	13861.1	15110.6	13859.6	11122.9	11242.4	10931.6	9143.88	8955.44	8822.29	10992.1	11403.2	11034.9	9893.63	8225.98	10274.4	11670.4	12808.1	12260.9	10313	9880.07	10201.5
CNAG_00519	CNAG_00519.1	Endogenous	612.67	343	1060	40.96	mRNA	ERG3	2309.16	2273.6	2391.74	1716.51	1878.77	1762.67	1263.62	1135.22	1209.84	1165.4	1063.91	996.292	1464.22	1721.7	1808.66	1664.46	1710.51	1562.58	1752.77	1755.25	1639.24	1541.76	1791.91	1726.04
CNAG_00777	CNAG_00777.1	Endogenous	637.83	358	921	33.77	mRNA		1760.74	1718.22	1828.08	1468.52	1319.47	1425.45	1795.35	1768.02	1758.25	1309.26	1238.46	1177.29	2139.55	1857.01	1942.16	1626.68	1404.02	1623.88	1943.18	1842.92	1917.05	1880.19	1874.99	1611.14
CNAG_00816	CNAG_00816.1	Endogenous	11893.2	8843	18199	30.33	mRNA		3275.34	3234.94	2895.53	4638.28	5092.15	4037.83	7593.67	11612	7692.86	8956.39	8749.39	8175.29	4148.36	5328.11	5990.02	4250.77	8274.62	3746.32	7051.03	7566.19	7341.28	5347.19	6301.65	6395.43
CNAG_00834	CNAG_00834.1	Endogenous	218.67	72	429	67.99	mRNA		55.3235	94.3464	97.8592	602.292	576.212	570.234	2814.4	2995.86	3835.78	3655.87	4035.21	3797.29	330.364	363.079	483.517	186.571	424.612	287.479	545.759	552.699	691.538	532.693	754.322	672.788
CNAG_00866	CNAG_00866.1	Endogenous	1913	822	3518	57.11	mRNA		6595.06	7640.22	7844.62	5237.3	6050.52	5539.04	15850.2	17938.9	17890.3	19500.8	20345.9	20420.3	12356.8	13526.8	14663.8	7445.87	8019.02	6519.93	15813	18375.9	18333.9	10526.6	11657.7	12012.8
CNAG_00883	CNAG_00883.1	Endogenous	1027.83	671	1320	26.04	mRNA	ECM2201	2329.79	2349.05	2340.12	5102.83	5369.57	5051.5	877.825	738.53	700.595	1126.48	987.79	1047.29	804.495	686.166	756.215	2148.7	1942.36	1987.61	785.837	637.06	661.647	2072.02	1956.15	1992.54
CNAG_00897	CNAG_00897.1	Endogenous	7486.33	5894	9104	18.24	mRNA	SKN1	24802.8	24457	23210.1	24083	23697.4	22848.6	21720.8	20877.4	19781.7	15772.2	14265.5	14264.3	20254.8	20141.8	21471.3	19192	22919.4	18314.6	23364.7	22192	21948.9	21896.1	21494.5	21313.3
CNAG_01075	CNAG_01075.1	Endogenous	27.17	23	35	17.17	mRNA		8.9058	1	1	1	10.9782	19.7251	33.9027	17.1754	48.6553	39.2601	7.41858	16.2917	29.3532	74.5107	21.9201	66.2127	57.0493	64.0646	50.7031	66.3864	33.9481	30.5005	58.7318	36.0516
CNAG_01242	CNAG_01242.1	Endogenous	609.17	382	915	32.76	mRNA	HAPX	2013.46	1977.8	2071.71	2016.89	1945.53	2079.56	1513.62	1274.53	1457.46	1772.69	1602	1462.29	1213.12	1362.71	1452.16	1619.68	1414.2	1524.43	1726.28	1912.39	1990.89	2287.25	2342.58	2156.91
CNAG_01243	CNAG_01243.1	Endogenous	278.5	204	369	20.17	mRNA	SET101	1143.56	1100.97	1088.92	1087.8	1055.4	1009.02	618.938	429.209	580.28	520.375	532.383	454.292	489.447	491.485	543.17	564.441	526.398	562.661	525.891	547.737	501.646	652.782	626.797	711.088
CNAG_01341	CNAG_01341.1	Endogenous	1406.17	818	2151	42.43	mRNA	ISP3	682.822	652.741	748.24	691.359	859.571	753.06	2653.23	3463.38	3241.2	3520.26	3205.77	3358.29	1110.18	1342	1496.19	599.429	729.971	629.413	1835.55	2064.57	2034.85	1378	1579.37	1518.58
CNAG_01463	CNAG_01463.1	Endogenous	452.67	309	672	29.27	mRNA		313.2	308.649	296.07	354.3	380.383	363.032	415.889	389.068	381.62	375.333	385.393	332.292	277.336	324.419	305.98	434.286	458.541	427.795	304.026	284.731	308.237	487.464	561.102	364.793
CNAG_01464	CNAG_01464.1	Endogenous	163	76	297	52.6	mRNA	FHB1	299.446	278.466	254.776	221.571	288.403	214.739	3862.65	4077.3	3361.52	4633.43	4058.83	3888.29	5456.9	5248.03	5715.9	2434.2	3298.38	3014.77	4921.79	4783.95	4802.35	3773.55	4023.59	4434.16
CNAG_01469	CNAG_01469.1	Endogenous	199.67	161	242	14.18	mRNA		1449.57	1282.07	1241.7	1341.03	1285.35	1327.95	724.269	696.028	700.595	532.167	582.255	562.292	976.055	720.683	690.881	1051.47	625.923	1019.03	784.181	704.879	791.759	1242.31	1125.3	982.379
CNAG_01477	CNAG_01477.1	Endogenous	630.17	507	804	21.22	mRNA		4262.14	4475.48	4072.41	4152.77	4434.93	4129.25	2082.16	1845.94	1872.97	1923.63	1888.1	1574.29	2175.42	2366.49	2270.25	2799.47	2401.53	2732.78	2310.74	2380.51	2263.42	2794.12	2810.18	2855.88
CNAG_01487	CNAG_01487.1	Endogenous	55	41	77	24.64	mRNA		1	26.4334	29.7241	20.7326	30.2643	17.6937	51.6695	44.3295	57.0493	105.295	84.8509	119.292	110.454	102.125	100.037	104	88.7162	141.715	121.898	112.702	84.9377	105.361	99.3079	80.7348
CNAG_01542	CNAG_01542.1	Endogenous	1594.67	1033	2801	40.1	mRNA		364.775	420.328	492.217	235.543	292.853	265.524	541.525	655.887	500.536	704.33	641.313	580.292	673.485	826.998	956.477	967.503	1065.87	942.738	941.473	1133.3	1066.05	1111.31	1440.25	1291.97
CNAG_01737	CNAG_01737.1	Endogenous	2355.67	1465	4013	39.2	mRNA	ERG25	6969.84	7635.7	7536.98	5879.98	5911.07	6170.8	5624.1	5216.59	5044.53	4914.08	4226.82	4443.29	10790.9	10123.3	9648.71	9851.65	6814.54	10526.4	8958.4	8662.88	8807.67	10629.6	9035.7	9023.77
CNAG_01810	CNAG_01810.1	Endogenous	304.83	89	524	69.4	mRNA		338.987	290.539	339.429	228.557	340.327	281.776	617.669	613.385	570.487	628.861	475.949	522.292	1043.12	831.14	893.984	946.51	1093.01	829.668	741.132	724.728	675.714	807.183	626.797	711.088
CNAG_01882	CNAG_01882.1	Endogenous	153.33	100	223	27.99	mRNA		265.063	293.558	277.488	253.007	255.764	300.058	158.27	143.501	121.404	71.0986	69.1019	66.2917	105.776	99.3635	80.1523	88.605	102.288	65.4269	130.177	106.085	58.5638	122.517	118.63	119.035
CNAG_01945	CNAG_01945.1	Endogenous	87.67	70	115	19.35	mRNA		1	1	1	1	1	1	45.3242	25.4397	48.6553	48.6938	44.1661	39.2917	1	10.998	1	1	38.9539	12.2978	5.99901	1	28.6733	1	1	2.53912
CNAG_02045	CNAG_02045.1	Endogenous	75.5	31	107	39.29	mRNA		256.467	295.067	194.9	242.528	237.962	287.87	40.2479	44.3295	29.0691	10.9593	1	1	62.1056	118.693	61.6884	38.2223	45.7397	28.6452	116.931	137.514	148.235	18.0236	18.1557	56.7973
CNAG_02060	CNAG_02060.1	Endogenous	247.33	136	382	37.82	mRNA		4592.22	4117.81	4481.22	4158.01	4283.61	4482.71	231.875	131.695	171.768	71.0986	24.4799	75.2917	352.199	302.328	290.357	402.097	166.753	329.71	168.258	163.98	142.96	290.954	176.596	243.509
CNAG_02095	CNAG_02095.1	Endogenous	524	352	724	27.37	mRNA		2475.92	2294.72	2530.08	1936.56	2033.06	1860.17	1612.61	1530.72	1443.47	1095.83	1128.22	1058.29	519.08	625.414	608.504	409.095	354.492	408.723	489.465	499.767	484.063	317.467	333.103	374.368
CNAG_02288	CNAG_02288.1	Endogenous	71.17	58	91	19.6	mRNA		58.7619	71.7087	75.1475	221.571	175.653	283.807	59.2838	45.5101	85.0296	85.249	181.969	43.2917	431.74	653.028	558.793	353.114	412.171	781.988	838.819	944.727	939.453	163.067	155.342	423.838
CNAG_02455	CNAG_02455.1	Endogenous	568.83	241	1000	51.45	mRNA		1583.67	1582.39	1582.38	2621.16	2633.9	2335.52	1179.86	1165.91	1061.54	2154.75	2231.96	2169.29	2162.94	1763.12	1743.32	3199.73	2091.65	3430.27	1719.65	1593.14	1699.02	3650.34	2939.63	3056.96
CNAG_02487	CNAG_02487.1	Endogenous	141.33	115	199	23	mRNA	PHS1	454.172	439.948	428.211	469.563	510.936	562.109	299.135	325.315	314.468	271.563	285.65	267.292	431.74	545.333	555.953	424.489	254.968	455.04	572.25	671.796	651.098	479.666	539.848	575.442
CNAG_02491	CNAG_02491.1	Endogenous	130.17	94	163	17.3	mRNA		694.856	779.512	680.105	549.899	496.1	497.104	144.311	129.334	110.212	114.729	78.2888	94.2917	161.923	182.206	159.689	179.574	176.931	158.062	186.471	129.243	88.4542	134.994	112.833	138.185
CNAG_02532	CNAG_02532.1	Endogenous	477.5	229	801	47.28	mRNA		259.905	269.411	298.135	1010.95	1163.7	929.792	480.61	536.645	399.807	607.636	637.376	552.292	297.611	410.023	372.734	996.893	781.996	858.276	408.336	397.212	357.468	874.246	785.237	877.054
CNAG_02553	CNAG_02553.1	Endogenous	94.17	76	123	23.05	mRNA		32.9742	11.3417	48.3064	115.04	107.409	100.981	125.275	145.862	164.773	86.4282	80.9136	121.292	90.1792	129.739	118.5	73.2103	121.514	80.412	125.21	92.8524	106.037	63.2521	62.5962	71.1598
CNAG_02722	CNAG_02722.1	Endogenous	1138.5	668	1665	34.49	mRNA		3503.99	3835.59	3533.52	3288.29	3481.01	3150.11	10866.6	12403	11972.4	10096.7	9993.56	10003.3	9295.18	8360.15	8661.6	5522.94	6874.48	5554.07	8986.55	9107.84	9294.71	7795.76	7459.03	7383.25
CNAG_02751	CNAG_02751.1	Endogenous	2179.67	587	4144	77.01	mRNA		944.137	1220.19	1202.47	2607.19	2892.04	2085.66	29812.3	36220.7	39512	78761.6	87331.3	89282.3	15427.7	17649.6	22716.9	15777.2	26902.7	17715.2	26664.5	31814	32843.1	25269.6	30655	30578.6
CNAG_02781	CNAG_02781.1	Endogenous	74.17	61	103	20.33	mRNA		124.09	83.7821	89.6004	738.513	755.722	647.427	257.257	319.412	287.886	1080.5	1056.04	1053.29	76.1424	103.506	131.283	371.308	483.422	306.551	93.7514	87.89	125.378	269.12	284.798	337.663
CNAG_02849	CNAG_02849.1	Endogenous	60.67	45	76	22.71	mRNA		1	1	33.8535	125.518	175.653	117.232	18.674	6.54987	12.2809	5.06328	1	2.29172	4.39891	30.328	16.2389	10.232	1	1	1	1	19.882	1	1	1
CNAG_02991	CNAG_02991.1	Endogenous	8417.5	6381	9704	14.34	mRNA		15175.5	15575.5	13834.3	16639.7	16549.6	15273.5	16437.7	18315.5	16782.2	14682.6	14947.9	14914.3	11890.4	12396	12456.6	12521.9	16549.9	11241.6	12852.6	12730.4	12848.2	13266.9	13170.6	12627.2
CNAG_03050	CNAG_03050.1	Endogenous	135.83	91	168	25.41	mRNA		77.6728	106.42	104.053	135.997	145.981	121.295	122.737	135.237	115.808	133.596	112.412	132.292	66.7845	77.2722	104.297	62.0142	132.824	132.179	138.455	107.74	121.861	124.077	159.206	170.101
CNAG_03080	CNAG_03080.1	Endogenous	804.5	560	1372	38.52	mRNA		5909.11	5722.06	5909.99	5221.58	4930.44	5563.41	3530.15	3071.42	2972.59	3508.47	3136.21	3074.29	3845.79	3466.92	3474.67	4557.27	4140.95	4141.38	3439.93	3009.08	2963.21	4671.88	4390.71	3955.41
CNAG_03129	CNAG_03129.1	Endogenous	465.5	352	713	28	mRNA		816.918	787.058	834.957	754.231	807.646	787.594	970.466	935.692	791.531	705.509	603.253	726.292	1370.64	1266.06	1298.77	1184.43	1192.53	968.621	1302.42	1220.97	1213.74	1059.84	1011.3	1033.45
CNAG_03159	CNAG_03159.1	Endogenous	359.17	219	462	25.23	mRNA		419.788	483.714	432.341	450.353	546.541	574.297	645.588	784.574	588.674	654.804	668.874	602.292	617.338	687.546	624.127	707.192	1078.31	629.413	630.2	622.173	584.284	694.891	669.305	660.021
CNAG_03227	CNAG_03227.1	Endogenous	1069	619	1577	37.25	mRNA		418.069	375.053	430.276	663.417	767.59	592.58	519.951	572.063	492.142	595.844	532.383	413.292	388.071	436.257	466.474	302.731	244.789	282.03	462.974	589.09	547.36	386.09	371.747	395.113
CNAG_03284	CNAG_03284.1	Endogenous	344.83	221	489	36.04	mRNA		588.268	633.122	570.676	577.842	601.432	574.297	667.162	667.693	570.487	569.901	394.58	548.292	1117.98	1042.39	949.376	925.517	1013.84	786.075	991.144	956.306	939.453	875.805	756.254	701.513
CNAG_03302	CNAG_03302.1	Endogenous	164.17	79	301	55.86	mRNA		416.35	355.434	488.088	333.342	325.491	401.628	401.929	334.76	387.216	342.315	313.21	334.292	590.824	621.272	612.765	467.875	409.909	430.519	626.889	461.722	510.437	450.034	416.188	433.413
CNAG_03346	CNAG_03346.1	Endogenous	230.17	96	423	61.64	mRNA	BZP4	660.473	607.466	574.805	170.925	252.797	253.336	225.53	267.465	230.527	95.8618	99.2874	46.2917	388.071	519.1	494.88	173.976	309.254	183.946	482.842	554.353	492.854	155.269	174.663	146.164
CNAG_03358	CNAG_03358.1	Endogenous	1557.5	969	2430	33.67	mRNA		8659.79	7975.26	8197.68	7610.69	7974.69	7663.88	7863.98	7979.23	7348.7	7418.71	7129.88	6928.29	9808.3	9181.68	9305	8531.9	6987.58	8576.98	10162.1	10365	10066.6	9806.09	10790.1	10447.2
CNAG_03369	CNAG_03369.1	Endogenous	118.17	76	148	26.17	mRNA	SWE102	2185.38	2214.74	2350.45	1704.28	1556.84	1657.03	176.037	182.461	191.355	99.3995	42.8537	72.2917	196.235	164.257	172.472	137.588	120.383	153.975	183.16	147.439	176.367	145.911	145.681	120.631
CNAG_03385	CNAG_03385.1	Endogenous	4438.83	2205	8036	51.3	mRNA	PCL103	15194.4	15071.4	14270	12888.4	11661.3	13049.1	28028	25263.4	25835.3	23961.7	23796.2	24409.3	23057.4	19941.6	20835	20710.5	23245.2	21796.6	7867.29	6419.88	6379.51	6080.2	5443.76	5439.53
CNAG_03474	CNAG_03474.1	Endogenous	64.5	29	122	61.24	mRNA		39.8509	23.4151	40.0476	1	33.2315	62.3845	78.3196	102.179	78.0345	87.6074	23.1675	44.2917	141.647	157.353	107.138	145.985	104.55	119.918	151.701	137.514	123.619	119.398	101.24	162.122
CNAG_03495	CNAG_03495.1	Endogenous	54.83	25	100	49.84	mRNA		43.2893	43.0344	73.0828	198.868	255.764	186.3	898.13	1033.68	1451.86	1025.07	1105.91	1249.29	121.372	194.633	179.573	87.2055	79.6685	85.8612	241.109	340.971	295.929	180.222	222.968	221.168
CNAG_03526	CNAG_03526.1	Endogenous	107.17	84	145	22.67	mRNA		658.754	702.544	667.717	572.602	513.903	505.23	144.311	147.043	142.389	122.983	111.099	107.292	208.712	202.917	149.747	243.952	169.014	183.946	143.423	147.439	169.334	153.709	155.342	160.526
CNAG_03567	CNAG_03567.1	Endogenous	671.33	510	880	20.42	mRNA	CBK1	3172.19	3333.04	2881.08	3373.87	3182.81	3432.48	1	1	1	1	1	3.29172	1	1	1	1	1	1	1	1	1	1	1	1
CNAG_03819	CNAG_03819.1	Endogenous	776.5	666	857	8.14	mRNA	ERG6	4243.23	4419.64	3942.33	3522.31	3679.81	3818.44	2376.58	2267.42	2121.99	1480.25	1263.4	1313.29	2479.55	2700.62	2533.01	2569.95	2999.81	2513.45	2345.51	2221.71	2110.45	1945.69	1931.03	1959.03
CNAG_03910	CNAG_03910.1	Endogenous	304	256	378	15.37	mRNA	ITR6	10296.4	10104.7	9289.91	5148.23	4997.2	5187.6	1767.43	1668.85	2001.68	569.901	714.808	480.292	2627.71	3167.3	3032.95	1191.43	1422.12	1524.43	4132.02	4142.15	4408.5	911.676	1061.54	1315.91
CNAG_04096	CNAG_04096.1	Endogenous	112.33	89	153	22.88	mRNA		156.755	124.53	161.865	214.586	221.643	206.614	304.212	286.355	296.28	238.545	204.28	232.292	239.905	135.262	178.153	141.787	137.348	220.727	211.307	170.596	183.4	208.295	161.138	120.631
CNAG_04098	CNAG_04098.1	Endogenous	869.67	245	1600	70.38	mRNA	PDR5-2	3779.06	4255.14	4489.48	2118.19	2037.51	1957.68	6852.54	6043.02	6425.35	7726.48	7838.58	7383.29	10054.7	10220	10479.6	10081.2	10650.8	10115	11857.5	11632	11902.2	10899.4	11555.3	11028.1
CNAG_04213	CNAG_04213.1	Endogenous	679.5	509	947	24.03	mRNA		5336.63	5107.83	4970.55	5036.46	4823.62	5002.75	1360.07	1053.75	1174.86	907.153	802.74	751.292	1445.51	1282.63	1239.12	1591.69	1253.61	1424.99	1077.24	923.224	969.343	1537.08	1312.73	1229.73
CNAG_04216	CNAG_04216.1	Endogenous	32.5	21	41	23.41	mRNA		1	1	1	1	1	1	1	1	1	1	1	1	1	1	1	1	1	1	1	1	1	1	1	1
CNAG_04243	CNAG_04243.1	Endogenous	277.17	185	370	24.17	mRNA	CDC24	2685.66	2315.85	2466.07	2231.7	2221.47	2211.6	834.677	743.252	672.615	547.496	550.757	453.292	1275.51	1093.48	1098.51	1136.84	775.21	964.535	1178.24	1100.21	1141.65	1100.39	1107.91	1003.12
CNAG_04256	CNAG_04256.1	Endogenous	397.33	344	492	14.65	mRNA	LPI6	313.2	298.085	287.812	413.678	408.57	379.283	577.059	640.539	668.418	446.085	448.389	405.292	378.713	447.303	501.981	305.53	290.027	303.827	610.332	709.841	675.714	476.547	497.34	495.651
CNAG_04283	CNAG_04283.1	Endogenous	1507.33	975	2202	29.16	mRNA		2518.9	2542.23	2798.49	3709.18	3783.65	3615.3	3641.83	3368.93	3747.64	3935.34	3855.41	4688.29	3034.78	2779.32	2917.91	3325.69	3773.39	3309.03	2853.81	2658.4	2850.68	3684.65	3244.92	3195.79
CNAG_04346	CNAG_04346.1	Endogenous	70.33	60	75	7.82	mRNA		122.371	126.039	124.7	99.3217	113.343	94.8869	176.037	152.946	185.758	100.579	116.349	98.2917	122.932	117.313	97.1959	99.8012	90.9782	136.266	95.4071	139.168	97.2455	119.398	87.7147	136.589
CNAG_04355	CNAG_04355.1	Endogenous	143.67	56	290	66.77	mRNA		297.727	267.902	281.618	247.768	272.084	312.247	478.072	392.61	457.167	484.999	370.957	464.292	439.539	441.78	388.357	446.882	590.863	378.752	355.353	271.498	243.181	351.779	284.798	278.618
CNAG_04417	CNAG_04417.1	Endogenous	564.5	348	912	39.27	mRNA		818.637	794.604	779.21	2158.36	1898.06	1935.33	761.072	681.86	657.226	3902.33	4049.65	4291.29	1007.25	853.231	840.013	3928.88	4196.37	4345.72	843.786	737.961	770.66	2656.87	2464.31	2570.23
CNAG_04453	CNAG_04453.1	Endogenous	94.17	62	133	27.84	mRNA	IPC1	896	841.388	787.469	866.002	883.307	836.348	188.728	168.294	205.345	119.446	145.222	125.292	133.849	183.587	127.022	245.351	109.074	271.132	164.947	170.596	202.741	348.66	360.154	304.151
CNAG_04496	CNAG_04496.1	Endogenous	389.83	316	475	16.16	mRNA		4480.48	4517.74	4316.04	3513.58	3802.94	3603.11	714.117	582.689	618.053	496.791	405.079	398.292	1125.78	983.018	902.506	1208.22	829.496	1068.07	982.866	812.397	874.397	1256.35	1202.59	1159.52
CNAG_04655	CNAG_04655.1	Endogenous	284.5	173	460	36.93	mRNA		732.678	675.379	706.946	680.881	831.383	866.819	420.965	374.901	338.251	391.842	348.646	417.292	194.675	251.242	261.951	263.545	321.694	273.856	274.223	223.528	204.499	267.56	228.765	299.364
CNAG_04804	CNAG_04804.1	Endogenous	1119.5	855	1733	28.59	mRNA	SRE1	2496.55	2771.62	2697.32	2888.36	2955.83	2912.44	2149.42	2040.75	2106.6	2174.8	2049.53	1898.29	1991.38	2612.26	2709.13	2564.35	2399.27	2378.59	3011.11	3114.94	3005.41	2811.27	3042.04	3240.48
CNAG_04899	CNAG_04899.1	Endogenous	439.5	228	669	43.85	mRNA		1165.91	1174.92	1062.07	1321.82	1316.5	1254.82	1608.8	1582.67	1488.24	1582.84	1503.57	1689.29	1913.4	1810.06	1781.67	2375.42	2158.38	1852.74	1598.79	1429.39	1568.91	2348.07	1782.25	1874.45
CNAG_04951	CNAG_04951.1	Endogenous	499	421	629	15.6	mRNA		1234.68	1256.41	1365.59	2416.83	2625	2487.88	1285.19	1154.11	1162.27	1476.71	1309.33	1544.29	1740.28	1446.94	1514.65	3472.64	2233.02	2980.72	1282.55	1229.24	1208.47	3112.28	2354.18	2587.78
CNAG_05077	CNAG_05077.1	Endogenous	312.17	105	614	69.15	mRNA	LPI11	1265.62	1220.19	1351.13	742.006	908.528	793.688	2773.8	3099.75	3074.72	2246.73	2210.96	2283.29	1710.65	1821.11	2106.92	666.606	907.532	625.326	2176.63	2382.16	2455.07	1173.69	1432.52	1437.19
CNAG_05159	CNAG_05159.1	Endogenous	4739.33	2628	8130	45.25	mRNA		2976.2	2727.86	2726.22	5397.97	5112.92	5189.64	2990.8	3491.72	2845.28	3710.12	3503.68	3231.29	1525.05	1739.65	1747.58	2756.09	3805.06	2717.79	2315.71	2158.86	2054.19	3255.76	3449.73	3446.34
CNAG_05303	CNAG_05303.1	Endogenous	23.33	20	27	15.73	mRNA	ICL1	155.036	215.08	163.93	146.475	177.136	346.78	50.4004	28.9815	71.0395	54.5898	147.847	1	1230.28	1314.39	1285.99	596.63	482.291	1242.44	1597.13	1621.26	1920.56	200.497	222.968	604.167
CNAG_05333	CNAG_05333.1	Endogenous	18	12	33	43.18	mRNA		419.788	338.833	413.758	401.453	413.021	415.848	460.306	417.403	422.192	347.032	315.835	259.292	160.363	212.582	230.704	141.787	178.062	192.119	264.289	256.611	269.555	234.808	207.511	240.318
CNAG_05387	CNAG_05387.1	Endogenous	206.17	143	308	29.6	mRNA		3486.8	3459.81	3665.66	3232.41	3219.9	3076.98	1348.64	1347.73	1303.57	880.031	905.108	752.292	2225.33	2398.25	2328.49	2026.94	1716.17	1978.07	3064.09	3146.37	3128.49	1820.92	1961.94	2014.88
CNAG_05451	CNAG_05451.1	Endogenous	337.67	305	383	9.33	mRNA		753.308	737.255	667.717	771.695	780.942	753.06	365.126	350.108	336.852	301.043	304.024	299.292	330.364	372.744	338.647	383.903	428.005	479.561	343.763	387.287	387.359	407.924	443.238	519.588
CNAG_05551	CNAG_05551.1	Endogenous	111	86	160	23.41	mRNA		675.945	628.595	630.552	507.985	506.485	568.203	215.378	227.324	178.763	143.03	122.911	105.292	154.124	212.582	182.414	152.983	146.395	122.643	169.914	154.055	185.159	181.782	130.223	165.314
CNAG_05558	CNAG_05558.1	Endogenous	325	245	406	18.23	mRNA	KIN4	2493.11	2312.83	2228.63	1899.88	1742.28	2051.12	969.197	866.036	951.018	730.273	752.868	673.292	1078.99	981.638	1021.81	1106.06	1073.78	1044.91	966.308	726.383	751.319	1031.77	982.32	987.166
CNAG_05571	CNAG_05571.1	Endogenous	468.83	217	860	54.04	mRNA		4447.81	4372.86	4807.44	5123.78	4927.47	5071.82	2729.38	2236.73	2369.62	3015.57	2836.98	2767.29	5366.44	4949.8	4657.78	6814.69	4532.26	6119.42	4338.98	3993.28	4076.19	5949.19	5138.47	5099.62
CNAG_05678	CNAG_05678.1	Endogenous	853.5	421	1675	58.93	mRNA		2644.4	2638.82	2519.75	3188.75	3233.26	3312.62	1815.66	1827.05	1671.51	1769.15	1827.73	1696.29	2535.7	3128.64	3338.32	3002.4	3552.85	2972.54	3300.85	3109.98	3299.04	2293.48	2245.98	2562.25
CNAG_05692	CNAG_05692.1	Endogenous	225.17	189	282	14.51	mRNA	LCB3	987.116	942.503	927.869	818.848	893.692	814.002	494.57	444.557	402.605	318.731	327.647	317.292	592.383	664.074	572.996	698.795	481.16	681.179	666.626	691.646	691.538	640.305	667.373	637.679
CNAG_05755	CNAG_05755.1	Endogenous	783.17	367	1306	53.71	mRNA		2314.32	2246.43	2255.47	2210.75	2237.79	2126.29	2611.36	2546.05	2336.04	2230.22	1850.04	2364.29	4775.34	4520.4	3900.76	4571.26	3715.71	3991.53	3883.66	3660.8	3562.78	4113.54	3600.44	3400.06
CNAG_05757	CNAG_05757.1	Endogenous	632.67	332	987	43.1	mRNA		825.514	835.352	777.146	783.92	783.909	761.186	1249.66	1250.92	1083.92	1060.45	767.305	1154.29	1752.76	1775.55	1943.59	1464.33	1742.18	1043.55	1870.32	1670.89	1581.22	1204.88	1237.37	1183.45
CNAG_05835	CNAG_05835.1	Endogenous	1968.17	1415	2432	20.38	mRNA	LIV3	4176.18	4000.09	4078.6	9413	8933.07	9124.46	2894.36	2784.53	2773.93	4530.84	3993.21	5006.29	4667.72	3845.23	3987.4	6597.77	5361.26	6979.02	3898.56	3538.4	3638.38	6708.72	5834.06	5610.29
CNAG_05968	CNAG_05968.1	Endogenous	301.17	148	432	30.04	mRNA	CDC420	784.253	781.021	783.34	637.22	727.534	671.804	323.247	410.319	275.295	259.771	184.594	233.292	492.566	462.49	412.502	508.461	447.231	397.824	413.303	382.324	452.414	474.987	296.392	323.301
CNAG_06092	CNAG_06092.1	Endogenous	3496.83	2826	4215	15.18	mRNA	CLN1	16167.4	16813	16747.6	16500	16606	15742.8	13983.4	12119.6	11789.2	9318.4	8916.07	8105.29	19769.7	17203.6	16447.7	15276.2	13517.8	14937.5	14101	12652.6	12830.6	11794.6	11195.9	10557.4
CNAG_06125	CNAG_06125.1	Endogenous	17499.3	9554	28842	41.26	mRNA	TEF1	111214	116980	120472	116352	112151	122036	105208	92513.4	103054	81489.1	79790.2	80272.3	122595	117786	108354	137407	121829	147564	105143	101942	101350	123632	120574	121089
CNAG_06165	CNAG_06165.1	Endogenous	302.67	257	364	14.88	mRNA		811.76	693.489	702.817	811.863	780.942	702.275	651.933	603.94	598.467	554.571	538.945	513.292	548.714	592.277	584.359	592.432	630.447	524.517	703.051	732.999	768.901	627.828	754.322	768.538
CNAG_06169	CNAG_06169.1	Endogenous	431	153	896	67.63	mRNA		925.226	1170.39	1212.8	1274.66	1415.9	1232.47	7190.11	8172.85	9142.24	10200.4	10941.1	10848.3	2788.36	3190.77	3488.87	1436.34	1994.39	1615.71	3958.17	4431.62	4470.04	2784.76	3227.53	3093.66
CNAG_06182	CNAG_06182.1	Endogenous	119.5	81	161	28.46	mRNA		1709.17	1814.81	1534.89	1492.97	1513.82	1531.09	478.072	416.222	402.605	354.107	289.587	324.292	595.503	637.841	570.156	614.824	571.637	643.035	525.891	491.497	438.348	551.408	485.747	524.376
CNAG_06252	CNAG_06252.1	Endogenous	328.83	156	540	54.7	mRNA	CCD6	660.473	637.65	768.887	483.535	527.255	598.674	927.318	861.313	778.94	888.286	760.743	785.292	1314.5	1314.39	1243.38	1160.64	1296.58	1039.46	1188.17	1168.03	1083.63	1075.43	935.948	982.379
CNAG_06291	CNAG_06291.1	Endogenous	120.67	54	214	59.87	mRNA	FPD1	1	29.4518	40.0476	92.336	135.597	127.389	643.05	795.199	1033.56	541.6	561.256	567.292	264.859	282.998	433.807	179.574	206.336	237.075	545.759	656.909	691.538	373.613	394.934	435.009
CNAG_06373	CNAG_06373.1	Endogenous	126.17	83	183	32.71	mRNA		101.741	94.3464	79.2769	127.264	126.695	86.7613	216.647	227.324	245.916	270.384	292.212	330.292	289.813	292.663	284.675	336.32	400.862	340.608	227.864	269.844	237.906	304.991	253.883	316.918
CNAG_06499	CNAG_06499.1	Endogenous	719.17	552	908	20.76	mRNA	DPP101	1738.4	1739.35	1638.13	1395.17	1527.17	1293.41	1233.16	1122.23	1145.48	643.012	710.871	556.292	999.45	1094.86	1033.17	747.778	698.304	738.395	1265.99	1311.94	1169.79	836.815	856.728	920.141
CNAG_06529	CNAG_06529.1	Endogenous	88	51	114	32.68	mRNA		89.707	141.131	118.506	277.457	246.863	190.363	206.494	214.338	173.167	126.521	172.782	154.292	110.454	73.13	92.935	158.581	153.181	183.946	121.898	96.1606	63.8386	120.957	105.104	157.335
CNAG_06534	CNAG_06534.1	Endogenous	221	159	313	24.62	mRNA	HMG1	1994.55	1820.84	1999.45	2013.4	2079.05	2211.6	728.076	602.759	692.201	668.954	615.065	676.292	1052.48	1140.42	1043.12	1142.44	875.865	1036.74	1024.26	977.81	937.695	1095.71	961.066	983.975
CNAG_06583	CNAG_06583.1	Endogenous	56	47	65	11.63	mRNA		730.959	818.751	692.493	618.01	576.212	602.737	102.432	129.334	133.995	110.012	206.905	99.2917	227.428	311.993	281.835	323.724	446.1	580.37	313.96	311.197	288.896	131.875	155.342	213.189
CNAG_06699	CNAG_06699.1	Endogenous	12932.5	7570	20862	37.84	mRNA	GPD1	55397.3	52609.1	52289.4	58381	59529.6	55401.8	59008.2	62063.1	56571.6	46148.4	45086.1	43497.3	57862.4	64182.3	63855.9	55645.3	53640.9	49117.2	68323.7	68677.9	68298.4	62271.1	64524.4	63984.2
CNAG_06746	CNAG_06746.1	Endogenous	5474.17	4503	6406	14.38	mRNA	H2B	31430.3	28331	29552.9	20492.3	19371.3	20124.5	13275.2	14071.2	13154.6	9154.49	8677.21	8400.29	10730	10543.1	11211	9216.27	10939.2	7543.01	10690.3	10004.4	10284.6	8892.17	8305.34	7909.88
CNAG_06829	CNAG_06829.1	Endogenous	429.5	283	636	28.76	mRNA	ERG1	741.274	726.691	696.622	963.801	947.1	1029.33	758.534	713.737	636.241	795.129	579.63	594.292	831.009	771.77	859.897	1206.82	900.747	1106.21	870.278	866.983	893.738	1301.58	1359.1	1456.34
CNAG_06916	CNAG_06916.1	Endogenous	219.67	62	398	74.24	mRNA		689.699	744.801	758.563	663.417	788.36	681.961	1936.22	1843.58	1744.26	1935.42	1860.54	1924.29	2499.82	2667.49	2932.11	2166.89	2870.88	1848.66	2802.49	2466.52	2470.9	2190.55	1969.67	2081.91
CNAG_07316	CNAG_07316.1	Endogenous	313.5	215	472	29.98	mRNA		509.186	532.007	523.188	631.981	567.311	606.8	715.386	795.199	785.935	548.675	561.256	540.292	679.723	770.389	822.969	519.657	616.875	632.137	820.606	946.381	890.221	531.133	543.712	572.25
CNAG_07358	CNAG_07358.1	Endogenous	618.17	453	828	22.27	mRNA		629.528	480.695	481.894	839.805	912.978	838.379	308.019	346.566	299.079	316.373	255.464	378.292	188.437	260.907	253.429	276.14	300.206	275.219	219.585	288.039	257.247	262.881	329.239	361.601
CNAG_07730	CNAG_07730.1	Endogenous	57.33	45	66	13.54	mRNA		38.1318	67.1812	60.6946	36.4504	30.2643	56.2903	63.091	40.7876	69.6404	97.0411	17.9179	65.2917	68.3442	82.795	71.6305	108.198	58.1803	99.484	67.2601	94.5065	76.1464	83.527	118.63	123.822
CNAG_07749	CNAG_07749.1	Endogenous	293.17	256	335	11.79	mRNA		536.692	618.03	527.317	558.631	469.396	578.36	593.556	673.596	637.64	538.063	598.004	484.292	589.264	586.754	595.721	501.463	515.089	534.053	592.119	681.721	644.065	685.534	678.966	650.446
CNAG_07799	CNAG_07799.1	Endogenous	1048.33	199	2602	87.64	mRNA		113.775	124.53	153.606	726.288	788.36	688.055	163.346	177.739	147.985	222.036	179.344	184.292	130.73	124.216	135.544	256.547	201.812	222.09	140.111	175.559	155.268	331.504	265.477	329.684
CNAG_07873	CNAG_07873.1	Endogenous	595.17	333	1001	44.2	mRNA		3003.71	2981.4	2881.08	2385.39	2406.92	2546.79	1347.38	1165.91	1139.89	749.14	604.566	572.292	1944.59	1836.3	1771.73	1371.96	1254.74	1268.32	1767.67	1576.6	1463.41	1173.69	1055.74	1070.15
CNAG_07902	CNAG_07902.1	Endogenous	835.5	436	1365	42.2	mRNA		1829.51	1752.93	1664.97	1995.94	2298.62	2034.87	4159.6	4327.59	4286.26	6036.68	6387.05	6545.29	2842.95	3103.79	3741.68	3465.64	5252.69	3415.28	4145.26	4501.1	4332.9	5732.41	6719	6515.12
									458546	458549	458547	458551	458551	458551	458551	458551	458551	458551	458551	458551	458551	458551	458551	458551	458551	458551	458551	458551	458551	458551	458551	458551
